1 **RBMX enables productive RNA processing of ultra-long exons important for**  
2 **genome stability**

3 Sara Luzzi<sup>1\*</sup>, Gerald Hysenaj<sup>1\*</sup>, Chileleko Siachisumo<sup>1\*</sup>, Kathleen Cheung<sup>2</sup>, Matthew  
4 Gazzara<sup>3,4</sup>, Katherine James<sup>5</sup>, Caroline Dalglish<sup>1</sup>, Mahsa Kheirollahi Chadegani<sup>1</sup>,  
5 Ingrid Ehrmann<sup>1</sup>, Graham R Smith<sup>2</sup>, Simon J Cockell<sup>2</sup>, Jennifer Munkley<sup>1</sup>, Yoseph  
6 Barash<sup>3,6</sup> and David J Elliott<sup>1†</sup>.

7

8 <sup>1</sup> Biosciences Institute, Faculty of Medical Sciences, Newcastle University, Newcastle,  
9 United Kingdom

10 <sup>2</sup> Bioinformatics Support Unit, Faculty of Medical Sciences, Newcastle University, Newcastle,  
11 United Kingdom.

12 <sup>3</sup> Department of Genetics, Perelman School of Medicine, University of Pennsylvania,  
13 Philadelphia, United States.

14 <sup>4</sup> Department of Biochemistry and Biophysics, Perelman School of Medicine, University of  
15 Pennsylvania, Philadelphia, United States.

16 <sup>5</sup> Department of Applied Sciences, Northumbria University, Newcastle, United Kingdom

17 <sup>6</sup> Department of Computer and Information Science, University of Pennsylvania,  
18 Philadelphia, United States

19

20 \* These authors contributed equally to the paper as first authors

21 † To whom correspondence should be addressed. Email: david.elliott@newcastle.ac.uk

## 22 Abstract

23 Previously we showed that the germline-specific RNA binding protein RBMXL2 is essential  
24 for male meiosis where it represses cryptic splicing patterns (1). Here we find that its  
25 ubiquitously expressed paralog RBMX helps underpin human genome stability by preventing  
26 non-productive splicing. In particular, RBMX blocks selection of aberrant splice and  
27 polyadenylation sites within some ultra-long exons that would interfere with genes needed  
28 for normal replication fork activity. Target exons include within the *ETAA1* (*Ewings Tumour*  
29 *Associated 1*) gene, where RBMX collaborates with its interaction partner Tra2 $\beta$  to enable  
30 full-length exon inclusion by blocking selection of an aberrant 3' splice site. Our data reveal a  
31 novel group of RNA processing targets potentially repressed by RBMX, and help explain why  
32 RBMX is associated with gene expression networks in cancer, replication and sensitivity to  
33 genotoxic drugs.

34

## 35 Introduction

36 Genome stability is essential to both prevent cancer and enable normal development (1).  
37 Nuclear RNA binding proteins can contribute to genome stability by regulating expression of  
38 genes involved in DNA replication and repair and/or directly participating in the DNA damage  
39 response (2). Furthermore, RNA binding proteins can suppress R-loop formation caused by  
40 aberrant excision of introns, which can lead to both transcription-replication conflicts and  
41 single-strand DNA damage (2).

42

43 Network analysis of alternative isoform ratios from thousands of tumours identified the  
44 nuclear RNA binding protein RBMX as a molecular switch closely linked to important cancer  
45 drivers (3). While the precise networks of gene expression controlled by RBMX in cancer  
46 cells are poorly understood, RBMX has also been identified as a potential tumour  
47 suppressor in oral and lung cancer, with tobacco induced mutations in *RBMX* predisposing  
48 smokers to future lung cancer development (4–8). RBMX also acquires somatic mutation in  
49 several cancer cohorts, including breast and endometrial cancer (9). Loss of the RBMX gene  
50 predisposes vemurafenib-resistant thyroid cancers to chromosome abnormalities (10).  
51 RBMX also contributes to mitotic progression and sister chromatid cohesion (11,12), and is  
52 required for normal brain development (13,14).

53

54 Data supports a direct role for RBMX in preventing DNA damage occurring at DNA  
55 replication forks stalled at repetitive DNA sequences (15,16). During replication stress,  
56 Replication Protein A (RPA) binds to single stranded DNA at stalled replication forks, leading  
57 to ATR activation by parallel pathways that depend on the protein kinases ETAA1 and  
58 TOPB1 respectively (17). RBMX binding to repetitive DNA sequences helps to stabilise  
59 TOBP1 to facilitate ATR activation at stalled replication forks, and depletion of RBMX causes  
60 replication defects and genome instability (15). RBMX protein also physically binds to the  
61 *NORAD* long ncRNA that is involved in DNA damage repair, although subcellular localisation  
62 experiments suggest that this direct protein-RNA association might not contribute to DNA  
63 repair (18,19). In addition, RBMX is needed for efficient p53-dependent DNA repair via non-  
64 homologous end joining (20), and depletion of RBMX sensitises U2OS osteosarcoma cells  
65 to DNA damage caused by ionising radiation and genotoxic drugs including cisplatin (21).

66

67 A critically important yet relatively unexplored molecular mechanism through which RBMX  
68 could promote genome stability is through splicing control. Splicing is a key process that  
69 allows maturation of protein-coding precursor RNAs (pre-mRNAs). In fact, most human  
70 genes are split up into exons and intervening intron sequences. Exons within pre-mRNAs

71 are spliced together by the spliceosome to create mRNAs (22). Alternative splicing of exons  
72 in different orders allows production of several transcript and protein isoforms from the same  
73 genes (23,24). Although this promotes diversity and functional differentiation, deregulation of  
74 alternative splicing patterns are often associated with human pathologies including cancer  
75 (3,25). RBMX protein contains an N-terminal RNA Recognition Motif (RRM) and a C-terminal  
76 disordered region. A global search of exon skipping patterns in HEK293 controlled by RBMX  
77 showed it can directly promote splicing by recognising N6-methyladenosine (m6A)  
78 modification patterns (26,27). These patterns are deposited within pre-mRNAs by the N6  
79 methyltransferase complex, which comprise a heterodimer of METTL3 and METTL14  
80 methyltransferase-like proteins (27). RBMX also directly interacts with and frequently  
81 antagonises the splicing activity of the SR protein-family splicing regulator Tra2 $\beta$  (28–31).  
82 Tra2 $\beta$  normally operates as a splicing activator protein by promoting exon inclusion. The  
83 physiological importance of the antagonistic splicing complexes formed between Tra2 $\beta$  and  
84 RBMX are poorly understood. Interestingly, Adamson et al (21) speculated that RBMX may  
85 be important for splicing of genes involved in DNA repair, and demonstrated an RBMX-  
86 requirement for BRCA2 protein expression. BRCA2 is a key tumour suppressor that is  
87 involved in the homologous recombination pathway used to repair DNA damage, although  
88 the molecular connection between BRCA2 and RBMX needs to be identified.

89  
90 Recent analyses from our group (32) show that a protein very similar to RBMX, called  
91 RBMXL2, reduces spliceosome selection of a group of weak splice sites, including  
92 previously unannotated “cryptic splice sites”. *RBMXL2* was derived by retrotransposition  
93 from the *RBMX* gene ~65 million years ago, and encodes a testis-specific protein with 73%  
94 sequence homology to RBMX (31,33). Genetic knockout of the *RBMXL2* gene in mice  
95 caused aberrant mRNA processing during meiosis, including the insertion of cryptic exons  
96 and premature terminal exons, and the modification of exon lengths through use of  
97 alternative splice sites. Furthermore, we showed that RBMXL2 is important for processing of  
98 some unusually large exons of over 1 kb in length. Intriguingly, one of the long exons  
99 controlled by RBMXL2 protein during meiosis was exon 11 of the mouse *Brca2* gene, where  
100 RBMXL2 repressed a cryptic 5' splice site (32). The similarities between RBMX and  
101 RBMXL2 suggests the possibility that RBMX may play a similar role in mRNA processing in  
102 somatic cells which do not express RBMXL2, and this might possibly contribute to the  
103 phenotype of cells when RBMX is depleted (21).

104

105 Here we have used a global approach based on RNA sequencing to test this hypothesis in  
106 human breast cancer cells, and find that RBMX ensures correct mRNA processing and

107 expression of genes that are key for genome stability. Importantly, our study provides  
108 molecular insights into how ultra-long exons are processed during RNA maturation.

## 109 Results

### 110 Global identification of a novel panel of RBMX-regulated RNA processing events

111 The sequence similarity between RBMX and RBMXL2 (34) prompted us to hypothesise that  
112 RBMX might control mRNA processing of genes involved in cell division and DNA damage  
113 response in somatic cells. To test this, we depleted *RBMX* from MDA-MB-231 cells (that  
114 model triple negative breast cancer) using siRNA, and performed RNA sequencing (RNA-  
115 seq) (Figure 1 – Figure supplements 1A, B). Western blot analysis confirmed >90%  
116 reduction of RBMX protein levels compared to control (Figure 1 – Figure supplement 1A),  
117 while RNA-seq analysis indicated a fold-change reduction in *RBMX* RNA levels upon  
118 treatment with RBMX siRNA of 0.12 compared to control, confirming successful RBMX  
119 knock-down.

120

121 In order to detect a wide range of transcriptome changes in RBMX targets we analysed our  
122 RNA-seq data using two bioinformatics programme, SUPPA2 and MAJIQ. SUPPA2 uses  
123 estimates of whole isoforms expression to detect global changes in RNA processing patterns  
124 (35). SUPPA2 analysis predicted 6708 differentially processed RNA isoforms upon RBMX  
125 knock-down. Strikingly, Gene Ontology (GO) analysis revealed that approximately 15% of  
126 the significantly enriched pathways were related to DNA replication, DNA repair and cell  
127 division, while others involved RNA processing, cellular response to stress and other stimuli  
128 (Figure 1A and Figure 1 – Source Data 1). MAJIQ is able to detect local splicing variations  
129 (LSV), including complex variations (LSV involving more than two alternative junctions), and  
130 de-novo variations (those involving unannotated junctions and exons) from RNA-seq data  
131 (36), thus providing complementary information to SUPPA2's analysis.

132

133

134 We also analysed RNA-seq data using the Majiq bioinformatic tool, which detects local  
135 splicing variations from RNA-seq data (36) and to identify the RNA processing patterns that  
136 most strongly depend on RBMX we visually inspected the RBMX predicted targets on the  
137 IGV genome browser (37). This visual search detected 155 strong changes in RNA  
138 processing including splice site selection, differential selection of terminal exons and  
139 alternative polyadenylation (polyA) sites, in addition to exon skipping (Figure 1B and Figure  
140 1 – Source Data 2). Most of these RNA processing events (80%) were predicted to be  
141 repressed by RBMX (Figure 1C). Importantly, comparison with publicly available RNA-seq  
142 data (26) showed that while 48% of the same splicing events that we identified in MDA-MB-  
143 231 cells also switched mRNA processing after RBMX depletion in HEK293 cells (Figure 1 –  
144 Figure supplement 1C), these largely did not respond to depletion of either *METTL3* or

145 *METTL14* m6A methyltransferases (Figure 1 – Figure supplement 1D). This indicates that  
146 the role of RBMX in repressing utilisation of splice sites is both cell-type and m6A-  
147 independent. Overall, 77% of the transcript variants that strongly changed after RBMX  
148 depletion were already annotated as mRNA isoforms on Ensembl (v94), and 23% were  
149 novel to this study (Figure 1 – Figure supplement 1E). Many genes contained single strong  
150 RBMX-regulated processing events, but in some genes like *CD44* and *TNC* (38,39) several  
151 adjacent exons are repressed by RBMX (Figure 1 – Source Data 2). Gene Ontology (GO)  
152 enrichment analysis of genes with strongly defective RNA processing patterns after RBMX  
153 depletion identified replication fork processing (GOBPID: 0031297, adjusted p-value =  
154 3.94e-06), and DNA-dependent DNA replication maintenance of fidelity (GOBPID: 0045005,  
155 adjusted p-value = 1.32e-05) as the only significantly enriched terms (Figure 1D, Figure 1 –  
156 Figure supplement 1F and Figure 1 – Source Data 3). This indicates that RBMX controls  
157 RNA processing of genes involved in genome maintenance.

158

Figure 1

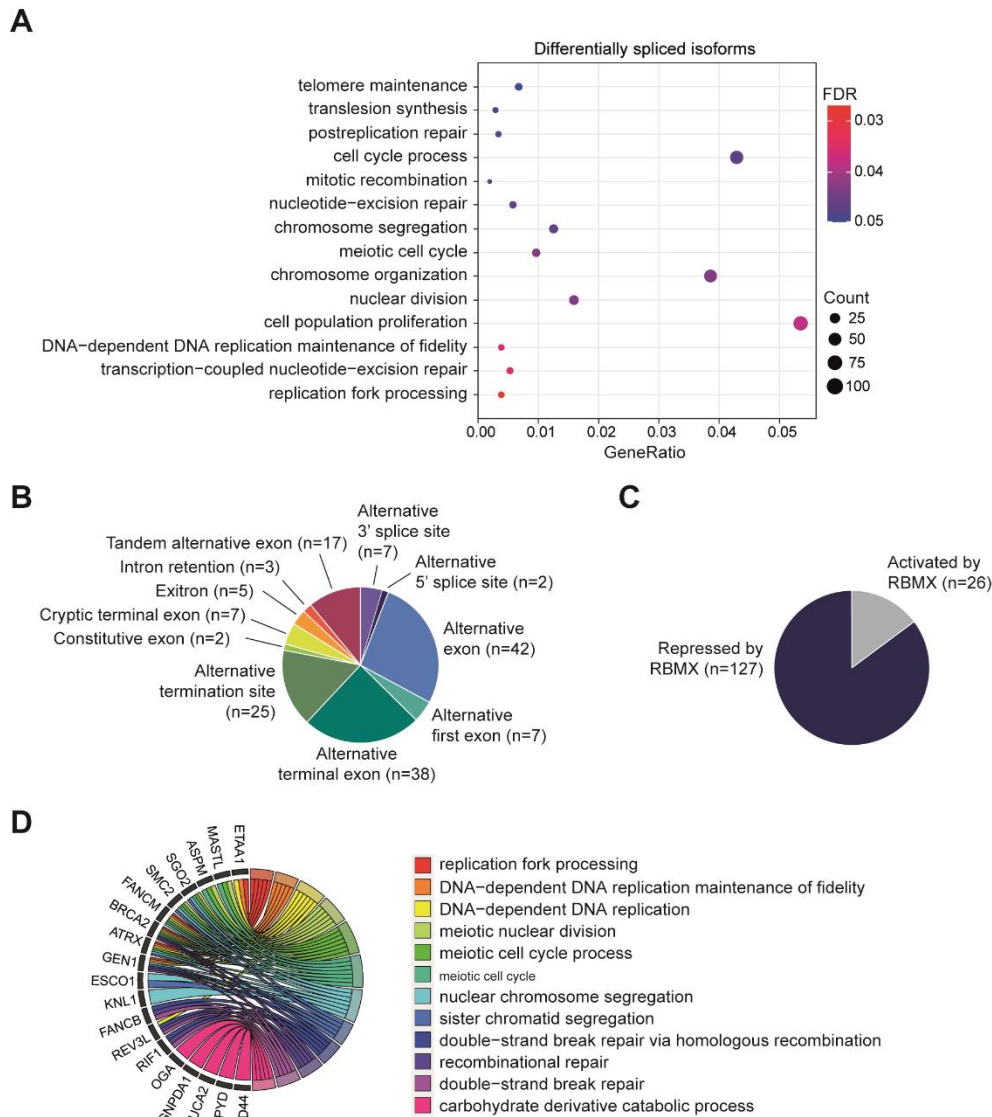

159

160

161 **Figure 1.**

162 **(A)** Dot plot representing some of the most significantly enriched terms identified by Gene Ontology  
 163 enrichment analysis of genes that undergo differential mRNA processing upon depletion of RBMX as  
 164 detected by SUPPA2 analysis (35) (Figure 1 – Source Data 1). This plot was generated using  
 165 GOstats v.2.54.0 (40) and ggplot2 (41) packages on R v.4.0.2. FDR, False discovery rate. Count,  
 166 number of genes. **(B-C)** Pie charts representing types of the strongest mRNA processing defects  
 167 detected after RBMX knock-down MDA-MB-231 cells by SUPPA2/MAJIQ analyses (35,36) (B), and  
 168 whether these RBMX-controlled mRNA processing patterns are either repressed or activated by  
 169 RBMX (C) (Figure 1 – Source Data 2). **(D)** Chord diagram presenting gene ontology of the most  
 170 strongly RBMX-regulated targets identified by SUPPA2/MAJIQ (35,36) (Figure 1 – Source Data 2,3),  
 171 produced using the Bioconductor GOplot (v1.0.2) package (42). Biological process GO terms with  
 172 count > 4 and size < 250 (GO:0031297 and GO:0045005) are shown.

173



Figure 1 – Figure supplement 1

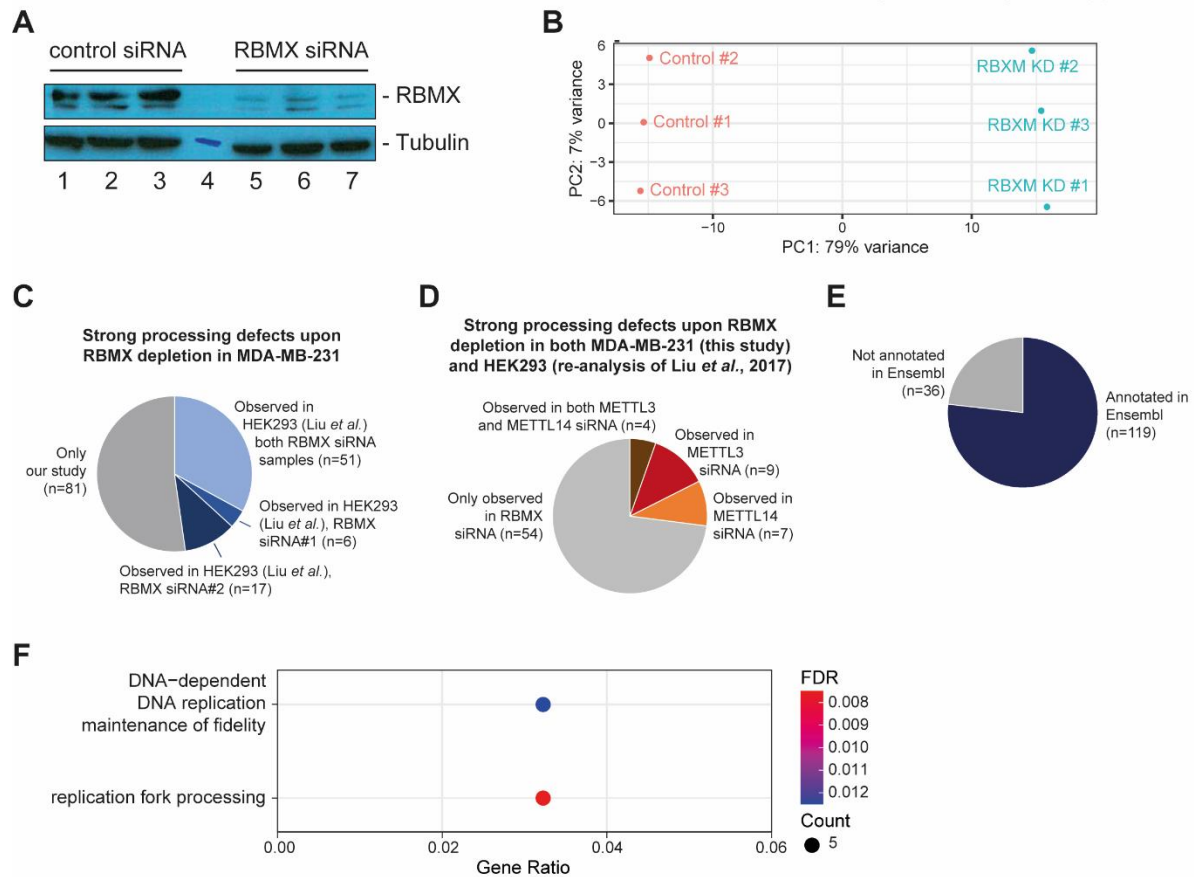

174

175

176 **Figure 1 – Figure Supplement 1. (A)** Western blot analysis confirming reduction in RBMX protein  
 177 levels in MDA-MB-231 cells after siRNA-mediated depletion of *RBMX*. Lanes 1-3, cells treated with  
 178 control siRNA. Lane 4, molecular weight size marker. Lanes 5-7, cells treated with siRNA against  
 179 RBMX. Samples were separated in the same gel and immunoblotted sequentially. Total RNA from the  
 180 same cell samples was sequenced by RNA-seq. **(B)** Principal component analysis of RNA-seq data  
 181 from cells treated with either control siRNA or siRNA against RBMX produced with DESeq2 v.1.16.1  
 182 (43) on R v.3.5.1. **(C)** Pie chart representing the proportion of the strongest RBMX-dependent RNA  
 183 processing events that were identified in MDA-MB-231 cells (Figure 1 – Source Data 1) but could also  
 184 be observed in RBMX-depleted HEK293 cells from (26), in either one or both samples treated with  
 185 two separate siRNA against RBMX (RBXM siRNA#1 and #2). **(D)** Pie chart representing RBMX-  
 186 dependent RNA processing events observed upon RBMX depletion in both MDA-M-231 and HEK293  
 187 cells (26) (see (C), blue slices) that can be detected after treatment with siRNA against either  
 188 *METTL3* or *METTL14* or both. Data from (26). **(E)** Pie chart representing whether the strongest mRNA  
 189 processing patterns detected after RBMX knock-down MDA-MB-231 cells by SUPPA2/MAJIQ  
 190 analyses (35,36) (Figure 1 – Source Data 1) were already annotated in Ensembl (v94). **(F)** Dot plot  
 191 representing gene ontology enrichment analysis of RBMX preferential targets identified by  
 192 SUPPA2/MAJIQ (35,36) (Figure 1 – Source Data 2,3) generated using GOstats v.2.54.0 (40) and  
 193 ggplot2 v.3.3.2 (41) packages on R v.4.0.2. FDR, False discovery rate; Count, number of genes.

194

195 Splicing control by RBMX is required for normal expression of ETAA1 (Ewing's Tumour  
196 Associated 1) protein kinase

197 The above data showed that genes involved in replication fork activity were globally enriched  
198 amongst genes showing strong splicing changes after RBMX depletion. Replication fork  
199 accuracy is critical for genome stability, and one of the most strongly RBMX-dependent RNA  
200 processing patterns was for the *ETAA1* (*Ewing's Tumour-Associated Antigen 1*) gene.  
201 *ETAA1* encodes a protein essential for replication fork integrity and processivity (44–46)  
202 (Figure 1D). Depletion of RBMX protein in MDA-MB-231 cells dramatically changed the  
203 *ETAA1* splicing profile, increasing selection of a very weak 3' splice site within exon 5  
204 (Weight Matrix Model score: -1.67, compared to 9.11 for the stronger upstream 3' splice site)  
205 (Figure 2A and Figure 2 – Figure Supplement 1A). We experimentally confirmed this *ETAA1*  
206 splicing switch using duplex RT-PCR from cells depleted for RBMX. While control cells had  
207 almost total inclusion of the full-length version of *ETAA1* exon 5, there was a significantly  
208 increased selection of the exon 5-internal 3' splice site in the RBMX depleted cells ( $p=0.099$ ,  
209 Figures 2B, C). We also found that RBMX-mediated splicing control of *ETAA1* exon 5 is not  
210 specific to MDA-MB-231 cells. Analysis of an RNA-seq dataset made from HEK293 cells  
211 from which RBMX had been depleted with two independent siRNAs (26) demonstrated a  
212 similar switch in the *ETAA1* splicing profile, while also detecting RBMX-mediated repression  
213 of an additional weak 3' splice site that is infrequently used in MDA-MB-231 cells (Figure 2 –  
214 Figure Supplement 1B).

215  
216 The full-length ETAA1 protein is 926 amino acids long. Splicing selection of the *ETAA1* exon  
217 5-internal 3' splice site produces an mRNA isoform predicted to encode an ETAA1 protein  
218 isoform of just 202 amino acids (Figure 2D). Although the *ETAA1* exon 5-internal 3' splice  
219 site is annotated on Ensembl (v94), it is rarely selected in cells treated with control siRNAs  
220 (Figure 2A). Confirming that correct expression of ETAA1 protein depends on RBMX,  
221 Western blot analysis with an antibody specific to ETAA1 protein showed strong reduction of  
222 the full-length ETAA1 protein after RBMX depletion (Figure 2E). Such a short ETAA1 protein  
223 would lack RPA binding motifs (Figure 2D) and thus be unable to operate similarly to the full-  
224 length ETAA1 protein isoform. Hence normal *ETAA1* gene function relies on the RNA  
225 processing activity of RBMX.

226

Figure 2

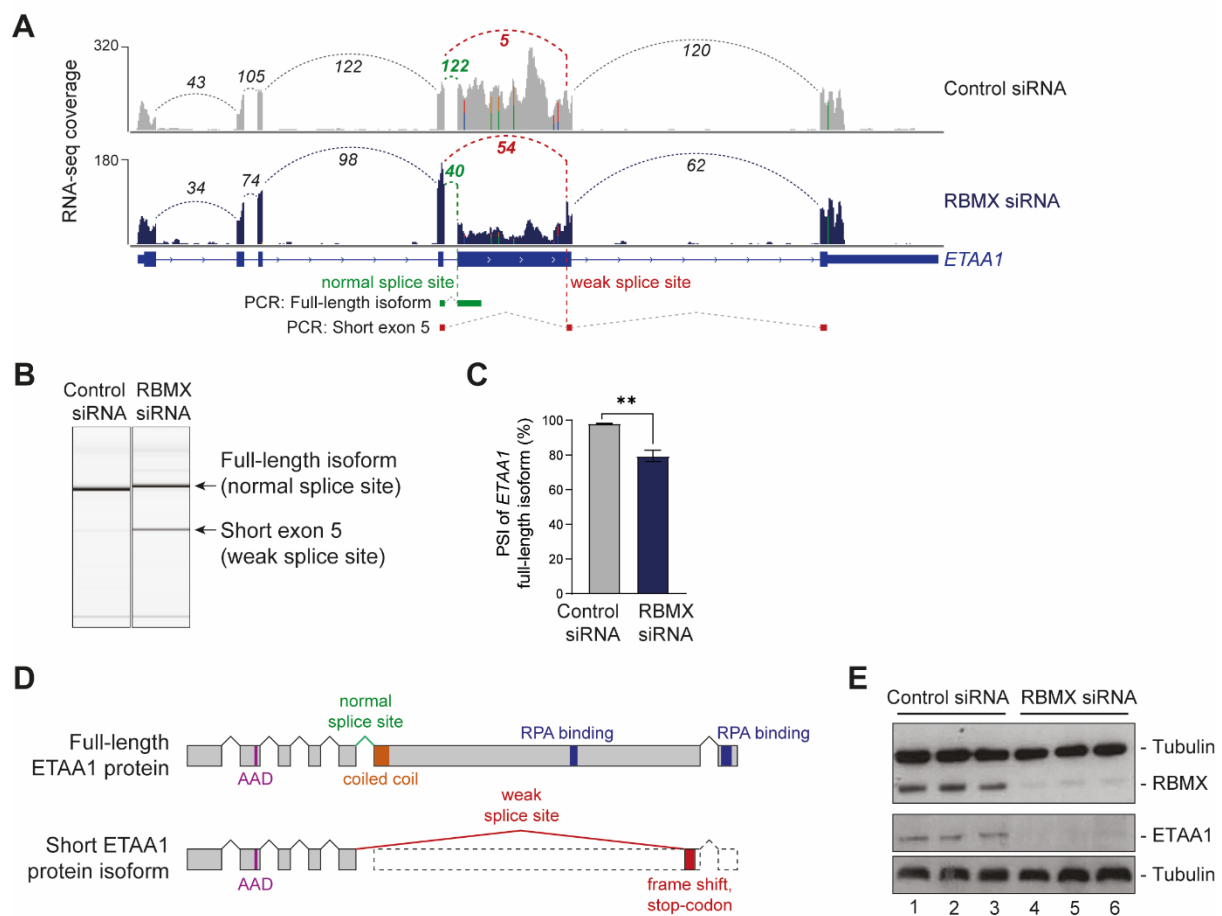

227

228

229 **Figure 2. RBMX is essential for normal ETAA1 protein expression.**

230 **(A)** Snapshot from IGV browser (37) showing merged RNA-seq tracks over the *ETAA1* gene, from  
 231 triplicate MDA-MB-231 cells taken after either *RBMX* depletion (“RBMX siRNA”) or control treatment  
 232 (“Control siRNA”). Splice junctions between *ETAA1* exons are shown with dotted lines. The splice  
 233 junction mainly used in controls cells is shown in green, and the splice junction normally used in  
 234 RBMX-depleted cells is shown in red. The position of the multiplex PCR products of the analysis in  
 235 (B) are also shown. Numbers indicate read count over each splice junction. **(B)** Representative  
 236 capillary gel electrophoretograms showing RT-PCR validation of the changing *ETAA1* splicing pattern  
 237 after siRNA-mediated depletion of *RBMX* in MDA-MB-231 cells. **(C)** Bar chart associated with the  
 238 experiment shown in (B) shows Percentage Splicing Inclusion (PSI) of the full-length *ETAA1* isoform  
 239 using data from three biological replicates. Bars, standard error. \*\*, p-value < 0.01 as calculated by t-  
 240 test with Welch’s correction. **(D)** Schematic representation of the *ETAA1* protein resulting from either  
 241 normal splicing (Full-length) or aberrant splicing detected upon *RBMX* depletion (Short isoform). AAD,  
 242 ATR-activation domain; RPA, Replication Protein A1 binding motif. **(E)** Western blot analysis  
 243 confirming no full-length *ETAA1* protein is detected after *RBMX* depletion. The Western blot contains  
 244 3 replicate protein samples for *RBMX* depletion (“RBMX siRNA”) or after treatment with a control  
 245 siRNA (“Control siRNA”). The same samples ran on two different gels and were probed sequentially

246 probed with either anti-RBMX and anti-tubulin antibodies, or with anti-ETAA1 and anti-tubulin  
247 antibodies.

Figure 2 - Figure Supplement 1

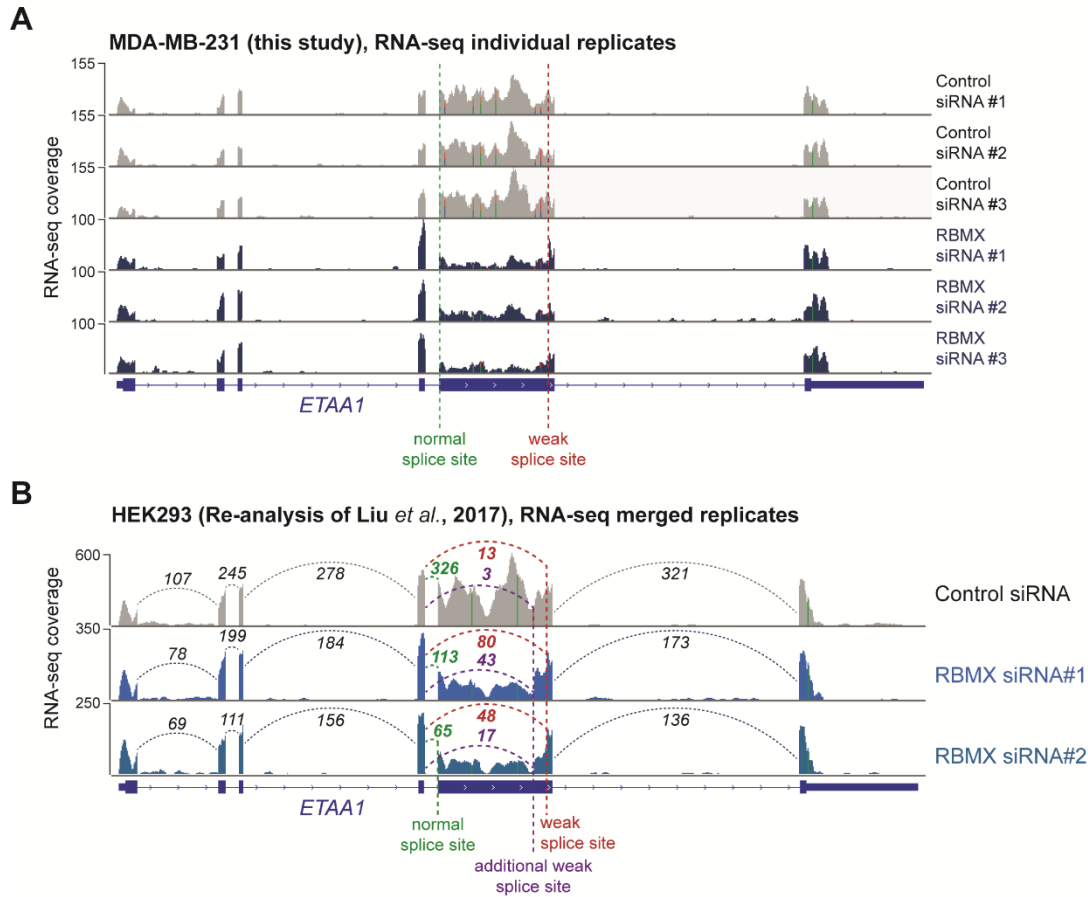

248

249 **Figure 2 – Figure Supplement 1. (A)** Snapshot from the IGV browser (37) showing single replicate  
 250 RNA-seq tracks from MDA-MB-231 cells treated with either control siRNA or siRNA against RBMX  
 251 across the *ETAA1* gene. The two 3' splice sites on *ETAA1* exon 5 are shown. **(B)** Snapshot from the  
 252 IGV browser (37) over the *ETAA1* gene, showing merged RNA-seq tracks from HEK293 cells treated  
 253 with either control siRNA (“Control siRNA”) or two separate siRNAs against *RBMX* (“RBMX siRNA1”  
 254 and “RBMX siRNA2”). The strong upstream 3' splice site and the two weak downstream 3' splice sites  
 255 on *ETAA1* exon 5 are shown. The HEK293 RNA-seq data is from (26).

256

## 257 RBMX cooperates with Tra2 $\beta$ to suppress cryptic splicing within *ETAA1* exon 5

258 Two possible mechanistic models could explain the different use of 3' splice sites within  
259 *ETAA1* exon 5 in RBMX-depleted cells: RBMX could normally promote recognition of the  
260 strong upstream splice site; or, RBMX could normally prevent usage of the weak  
261 downstream splice site. In order to distinguish between these two possibilities, we performed  
262 a minigene assay. Briefly, a fragment of *ETAA1* exon 5 that spanned the weak internal 3'  
263 splice site and flanking genomic regions (but not the stronger upstream 3' splice site) was  
264 cloned into an expression plasmid between two  $\beta$ -globin exons (47) (Figure 3A and Figure 3  
265 – Figure Supplement 1A). When transfected into HEK293 cells, this minigene expressed a  
266 splice variant including the shorter version of *ETAA1* exon 5 (Figure 3B). Co-transfection of  
267 RBMX only weakly suppressed inclusion of the short exon, evidenced by a slight but not  
268 significant production of an RNA isoform in which the  $\beta$ -globin exons are directly spliced  
269 together. (Figures 3B, C).

270

271 Co-transfection of an expression plasmid encoding RBMX only slightly repressed selection  
272 of the weak *ETAA1* splice site contained in the minigene. We thus further examined the  
273 mechanism of RBMX-dependent processing of *ETAA1* exon 5. RBMX directly interacts with  
274 the splicing regulator Tra2 $\beta$ , frequently to antagonise splicing activation (28–31). Previously  
275 published RNA-seq data indicated MDA-MB-231 cells that were jointly depleted for both  
276 Tra2 $\beta$  and its partially redundant paralogue Tra2 $\alpha$  (48) had similar *ETAA1* exon 5 splicing  
277 defects to those observed upon *RBMX* depletion (Figure 3 – Figure Supplement 1B).  
278 Furthermore, Tra2 $\beta$ -RNA association analysis using iCLIP revealed that *ETAA1* exon 5 is  
279 also directly bound by Tra2 $\beta$  (48) (Figure 3 – Figure Supplement 1B). Consistent with a role  
280 for Tra2 proteins in regulating processing of *ETAA1* exon 5, RT-PCR analysis confirmed a  
281 switch in splicing inclusion from the long to the short version of *ETAA1* exon 5 in response to  
282 joint depletion of Tra2 $\alpha$  and Tra2 $\beta$  in MDA-MB-231 cells (Figures 3D, E). We also obtained  
283 very similar results in the MCF7 breast cancer cell line (Figure 3 – Figure Supplements 1C,  
284 D). Thus Tra2-mediated repression of the internal weak 3' splice site within *ETAA1* exon 5  
285 occurs in multiple breast cancer cell types.

286

287 Further minigene experiments supported Tra2-mediated repression of *ETAA1* exon 5  
288 internal splicing, and moreover an interaction between Tra2 $\beta$  and RBMX. Co-transfection  
289 into HEK293 cells of an expression vector encoding Tra2 $\beta$  with the *ETAA1* exon 5 minigene  
290 (Figure 3A) confirmed that splicing inclusion of the shorter *ETAA1* exon 5 was weakly but  
291 significantly repressed by Tra2 $\beta$  (Figures 3F, G). Strikingly, while Tra2 $\beta$  normally operates  
292 as a splicing activator (49), co-transfection of RBMX and Tra2 $\beta$  resulted in much stronger

293 repression of the shorter version of *ETAA1* exon 5 than either RBMX or Tra2 $\beta$  alone  
294 (Figures 3F, G). Interestingly, co-transfection of a Tra2 $\beta$  isoform containing a deletion within  
295 its RRM domain (either Tra2 $\beta$  $\Delta$ RNP1, or Tra2 $\beta$  $\Delta$ RNP1,2) (50) was sufficient to efficiently  
296 reduce repression of the weak *ETAA1* splice site (Figures 3F, G). This suggests that direct  
297 Tra2 $\beta$ -RNA interactions are important for RBMX-mediated suppression of the short splice  
298 isoform of *ETAA1*. However, deletion of RS1 or RS2 domains (normally used for splicing  
299 activation by Tra2 $\beta$ ) did not block splicing repression of the short *ETAA1* exon.  
300

Figure 3

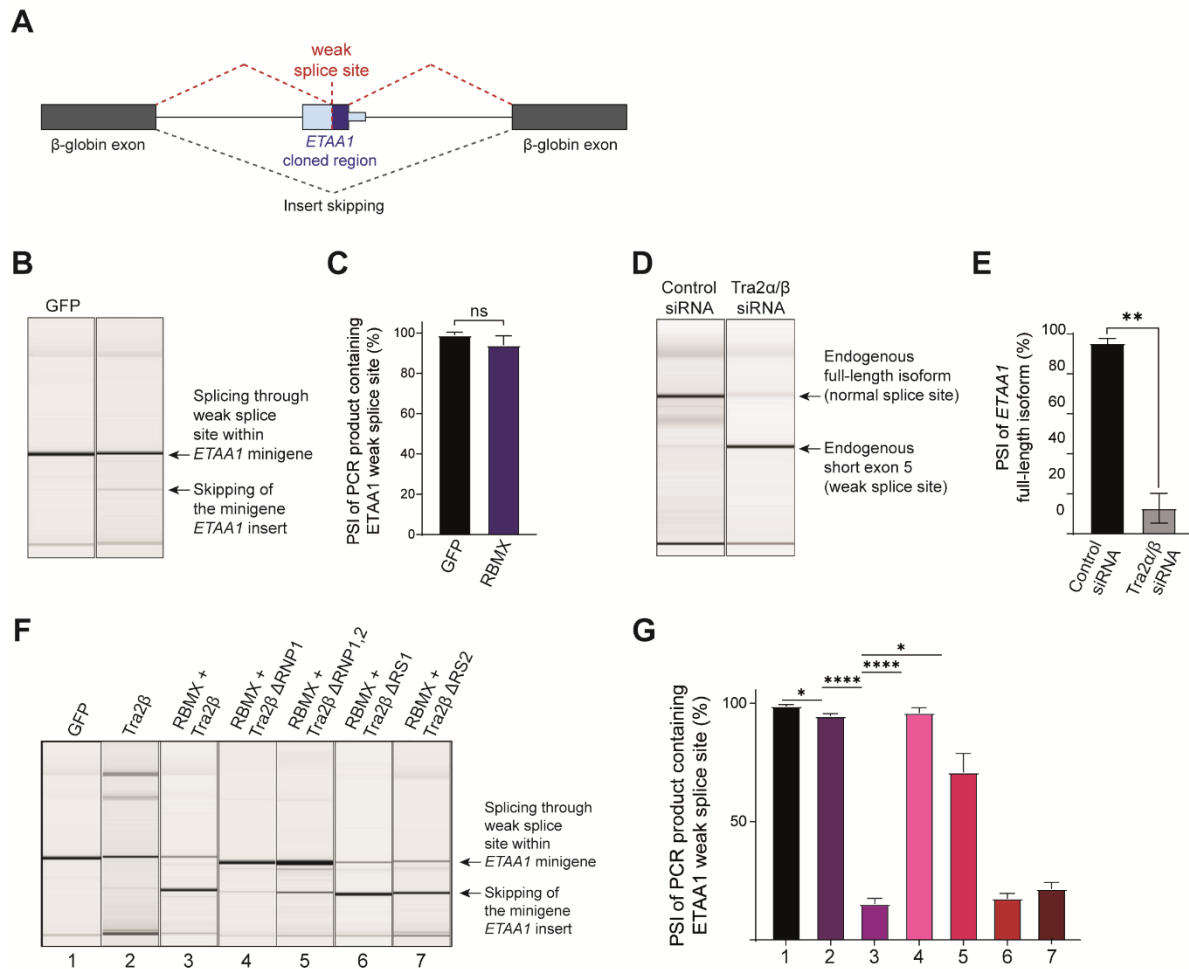

301

302

303 **Figure 3. RBMX cooperates with Tra2β to enable splicing inclusion of full-length *ETAA1* exon 5**

304 **(A)** Schematic representation of the minigene containing a portion of the *ETAA1* gene around the

305 weak splice site used upon depletion of RBMX (see Figure 2A and Figure 3 – Figure Supplement 1A)

306 cloned between the two β-globin exons of the pXJ41 plasmid (47). Dotted lines indicate the two

307 possible splicing patterns of the *ETAA1* minigene. **(B)** Representative capillary gel

308 electrophoretograms showing RT-PCR analysis of the *ETAA1* minigene transfected in MDA-MB-231

309 cells co-transfected with expression plasmids encoding either GFP or RBMX. The two products

310 derived from either recognition of the *ETAA1* weak splice site (upper band) or skipping of the *ETAA1*

311 insert (lower band) are indicated. **(C)** Bar chart associated with (B) shows Percentage of Splicing

312 Inclusion (PSI) of the short form of the *ETAA1* exon (shown as dotted red lines in (A)). Bars, standard

313 error. \*, p-value < 0.05 as calculated by t-test with Welch's correction across 4 biological replicates.

314 **(D)** Representative capillary gel electrophoretogram showing RT-PCR validation of the changing

315 *ETAA1* splicing pattern after joint depletion of Tra2α and Tra2β in MDA-MB-231 cells. **(E)** Bar chart

316 associated with panel (D) showing Percentage Splicing Inclusion (PSI) of the full-length isoform of

317 *ETAA1* and including data from three biological replicates. Bars, standard error. \*\*\*\*, p-value < 0.0001

318 as calculated by t-test with Welch's correction. **(F)** Representative capillary gel electrophoretograms

319 showing RT-PCR analysis of the *ETAA1* minigene co-transfected into MDA-MB-231 cells with



320 expression plasmids encoding the indicated proteins and protein isoforms. Tra2 $\beta$  $\Delta$ RNP1 and  
321 Tra2 $\beta$  $\Delta$ RNP1/2 are protein isoforms of Tra2 $\beta$  lacking either one or both RNP motifs within the RRM  
322 (50). Tra2 $\beta$  $\Delta$ RS1 and Tra2 $\beta$  $\Delta$ RS2 are protein isoforms of Tra2 $\beta$  lacking one of its arginine-serine RS  
323 domains. The two products derived from either recognition of the *ETAA1* weak splice site (upper  
324 band) or skipping of the *ETAA1* insert (lower band) are indicated. **(G)** Bar chart associated with (F)  
325 shows Percentage of Splicing Inclusion (PSI) of the *ETAA1* spliced insert as shown in (A) (dotted red  
326 lines), including data from 3 to 7 biological replicates. Bars, standard error. \*, p-value < 0.05 and \*\*\*\*,  
327 p-value < 0.0001 as calculated by t-test with Welch's correction.

328

Figure 3 - Figure Supplement 1

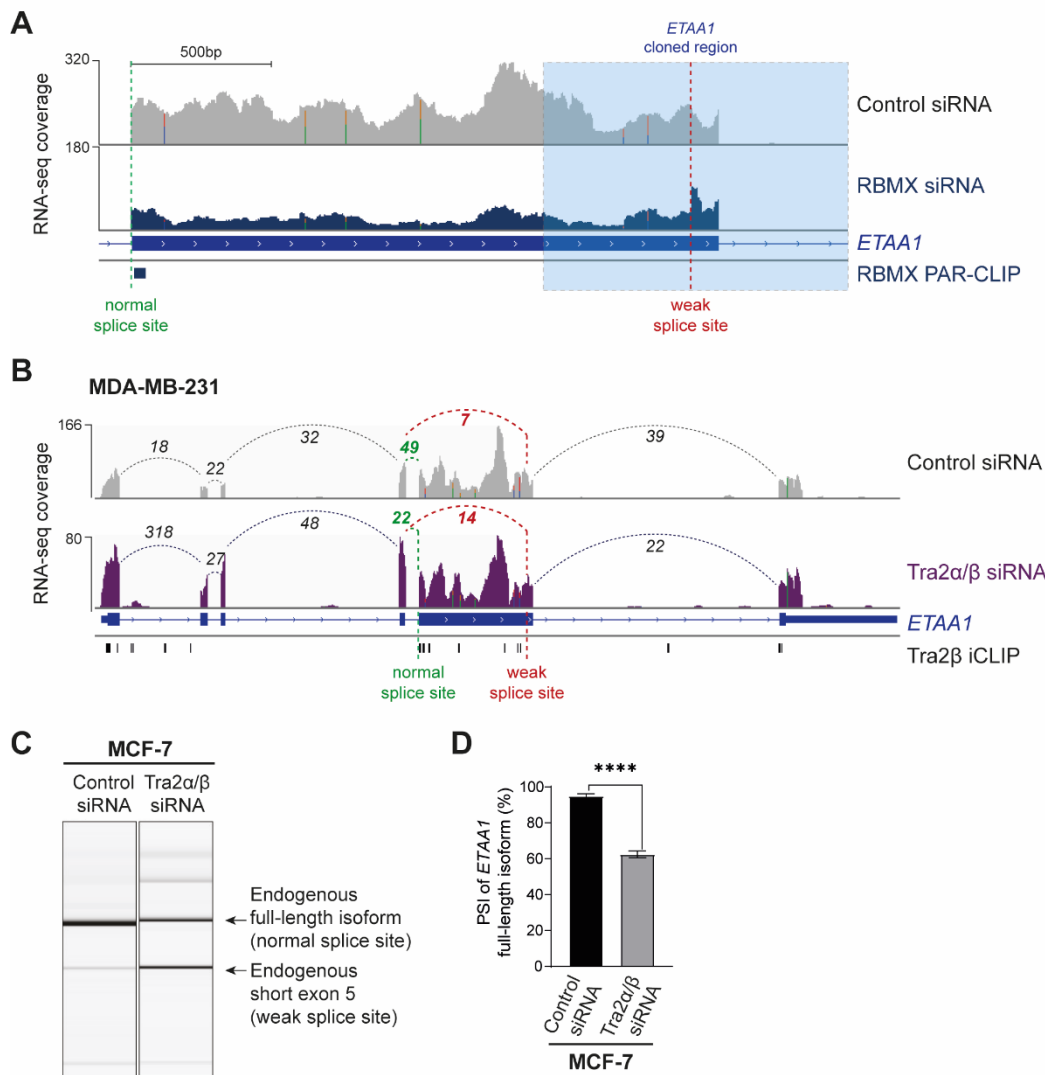

329

330

331 **Figure 3 – Figure Supplement 1. (A)** Snapshot over the *ETAA1* exon 5 showing merged RNA-seq  
 332 tracks from MDA-MB-231 treated with either control siRNA or siRNA against RBMX, as well as the  
 333 RBMX PAR-CLIP binding site from (26). The two 3' splice sites are shown. The region cloned into the  
 334 pXJ41 minigene (47) (Figure 3A) is indicated in blue. **(B)** Snapshot over the full-length *ETAA1* gene  
 335 shows merged RNA-seq tracks from MDA-MB-231 treated with either control siRNA (“Control siRNA”)  
 336 or two siRNAs against *TRA2A* and *TRA2B* (“Tra2 $\alpha$ / $\beta$  siRNA”), and from iCLIP for Tra2 $\beta$  RNA binding.  
 337 The two 3' splice sites on *ETAA1* exon 5 are shown. RNA-seq and iCLIP data are from (48). **(C)**  
 338 Representative capillary gel electrophoretograms showing RT-PCR validation of the changing *ETAA1*  
 339 splicing pattern after joint depletion of Tra2 $\alpha$  and Tra2 $\beta$  in MCF7 breast cancer cells and NCI-H520  
 340 lung cancer cells. **(D)** Bar chart associated with (C) showing Percentage Splicing Inclusion (PSI) of  
 341 the full-length isoform of *ETAA1* and including data from three biological replicates. Bars, standard  
 342 error. \*\*\*\*, p-value < 0.0001 as calculated by t-test. \*, p-value < 0.5 as calculated by t-test.

343

344 RBMX efficiently represses a spectrum of alternative RNA splice sites in ultra-long  
345 exons within genes that are important for genome stability

346 The above data showed that RBMX prevents cryptic mRNA processing of the ultra-long  
347 *ETAA1* exon 5, which at 2111nt is considerably longer than the 129 nt median size of human  
348 exons. Further examination revealed that RBMX also controls productive splicing patterns of  
349 ultra-long exons in other genes important in genome stability. RBMX efficiently represses a  
350 cryptic (defined as not annotated in Ensembl v94) 3' splice site within the 4161nt exon 13 of  
351 the *REV3L* (*REV3 Like, DNA Directed Polymerase Zeta Catalytic Subunit*) gene (Figure 4A).  
352 *REV3L* encodes the catalytic component of DNA polymerase  $\zeta$  that helps repair of stalled  
353 replication forks (51) and trans-lesion DNA replication. Furthermore, *REV3L* plays a key role  
354 in the response to ionising radiation, which is known to be defective in RBMX-depleted cells  
355 (21). The high amplitude splicing switch that occurs in response to RBMX depletion removes  
356 coding information for 1387 amino acids from the *REV3L* protein (normally 3130 amino acids  
357 long). Comparative analysis between our RNA-seq and published RNA-seq data from  
358 HEK293 cells (26) revealed the same RBMX-dependent and m6A-independent processing  
359 of *REV3L* pre-mRNA (Figure 4 – Figure Supplement 1A). Additionally, analysis of RBMX-  
360 RNA association by PAR-CLIP from HEK293 cells (26) revealed multiple direct RBMX  
361 binding sites to *REV3L* exon 13 (Figure 4A and Figure 4 – Figure Supplement 1A)  
362 supporting a direct role for RBMX in *REV3L* mRNA processing. RBMX also prevents the use  
363 of internal 3' splice sites in ultra-long internal exons in the *RIF1* (*Replication Timing*  
364 *Regulatory Factor 1*) gene (3236nt exon 30, Figure 4 – Figure Supplement 1B) and *ASPM*  
365 (*Assembly Factor For Spindle Microtubules*) gene (4754nt exon 18, Figure 4 – Figure  
366 Supplement 1C).

367

368 The RBMX-mediated repression of internal 3' splice sites in the *ETAA1*, *REV3L* and *RIF1*  
369 genes enables production of full-length protein coding mRNAs that are important for genome  
370 stability (52). RBMX also controls splicing of an 87nt exitron (*i.e.* exonic intron) within the  
371 3097nt exon 9 of the *ATRX* gene, which encodes a SWI/SNF family ATP-dependent  
372 chromatin remodeller involved in repair of stalled replication forks, gene regulation and  
373 chromosome segregation (53) (Figure 4B). Although annotated on Ensembl v.94 as an  
374 intron retention event, analysis of exon-junction reads show that this *ATRX* exitron is hardly  
375 ever used in control MDA-MB-231 cells (Figure 4B). Furthermore, PAR-CLIP data (26)  
376 confirmed that RBMX protein directly interacts with *ATRX* exon 9 at multiple sites (Figure  
377 4B).

378

379 Strikingly, we found that most of the mRNA processing events that we identified to be  
380 strongly regulated by RBMX are located within large exons, 80% of which are longer than  
381 the 129 nt median exon size (Figures 4C, D and Figure 1 – Source Data 2). Consistently,  
382 analysis of gene expression patterns from HEK293 cells (26) showed that 60% of the exons  
383 with reduced splicing after RBMX depletion are also longer than the median human exon  
384 size (Figure 4 – Figure Supplements 1D, E). This is consistent with RBMX ensuring correct  
385 inclusion of unusually long exons during mRNA processing across different cell types.

386

387

388

389

Figure 4

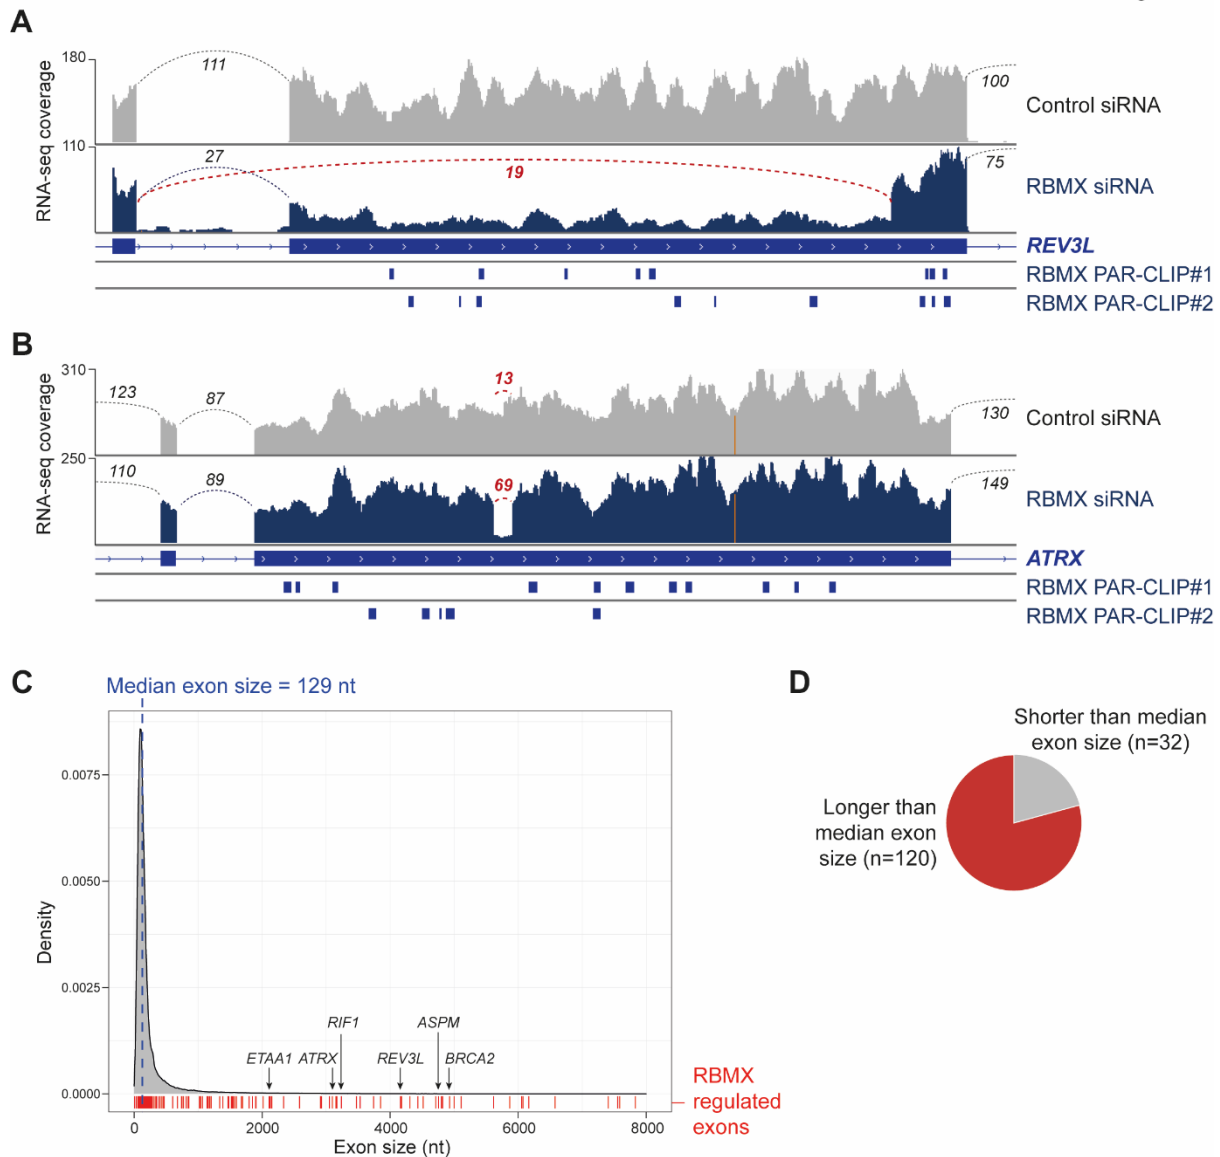

390

391 **Figure 4. RBMX efficiently represses a spectrum of RNA splicing events within large exons in**  
 392 **MDA-MB-231 cells.**

393 **(A-B)** Snapshots from IGV browser (37) over the *REV3L* and *ATRX* genes showing merged RNA-seq  
 394 tracks from triplicate MDA-MB-231 cells taken after either *RBMX* depletion (“*RBMX* siRNA”) or control  
 395 treatment (“Control siRNA”), as well as *RBMX* PAR-CLIP from (26). **(C)** Distribution of human exon  
 396 sizes from genome build hg38 annotated in Ensembl (v101). Dashed blue line denotes the median  
 397 exon size (129 nt). Exons that contain sites strongly regulated by *RBMX* (Figure 1 – Source Data 2)  
 398 are indicated in red. Plot was created using ggplot2 (41) on R v.4.0.2. **(D)** Pie chart representing the  
 399 proportion of exons containing *RBMX*-regulated RNA processing sites that are either larger (red slice)  
 400 or shorter (grey slice) than the median size of human exons.

401

402

Figure 4 - Figure Supplement 1

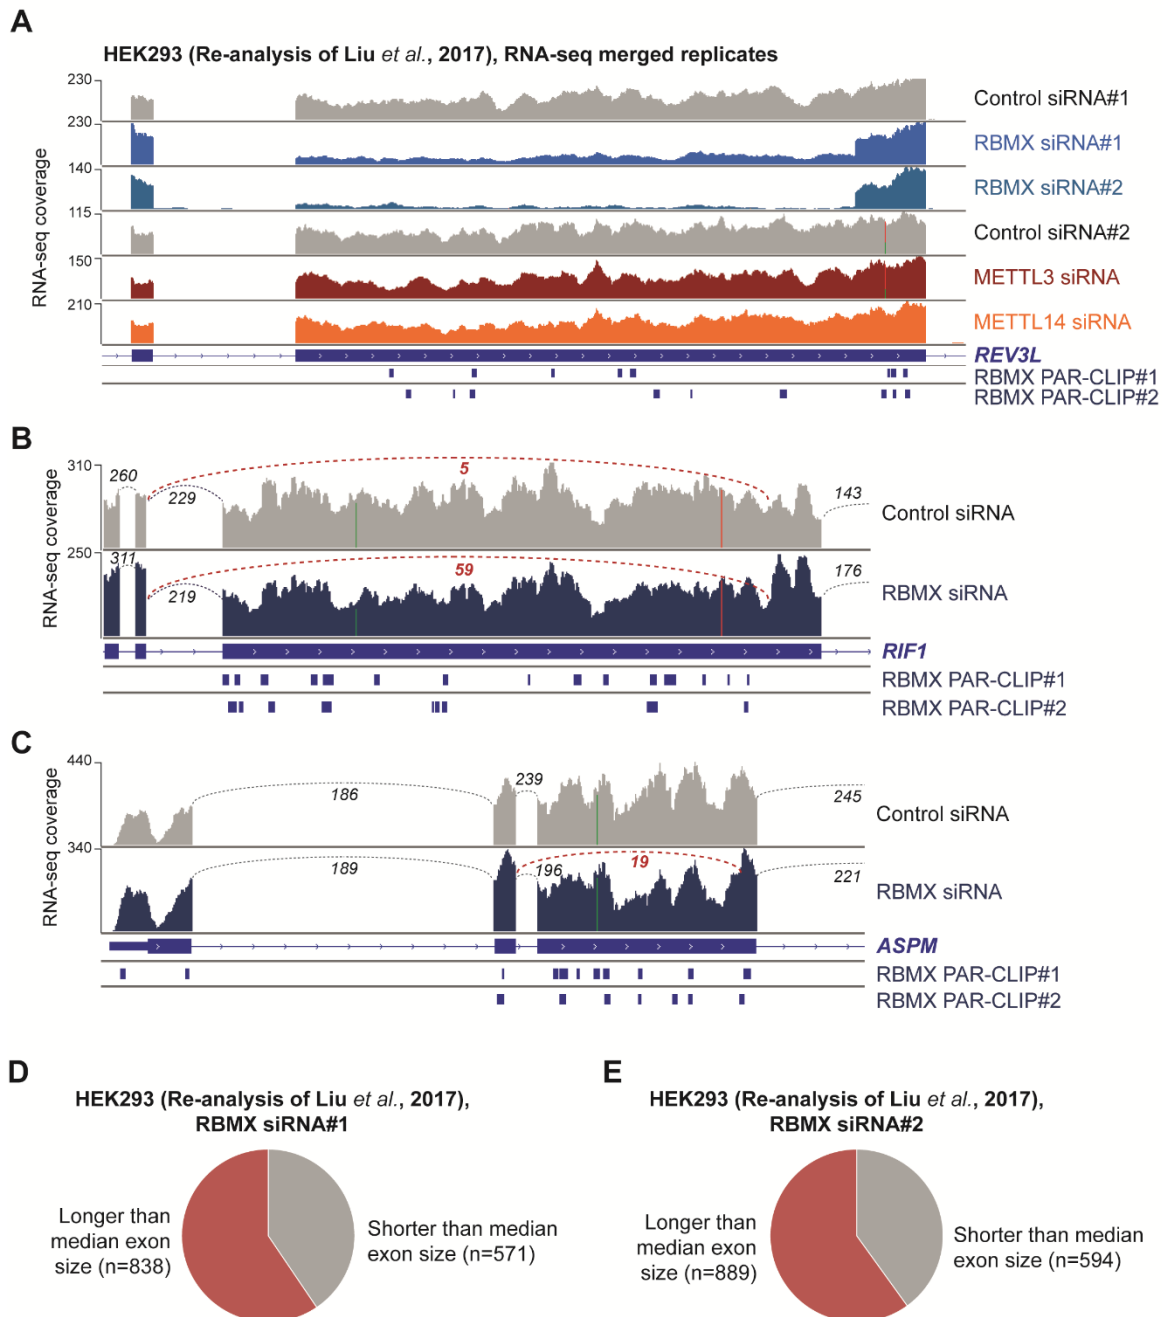

403  
404 **Figure 4 – Figure Supplement 1. (A)** Snapshot from the IGV browser (37) over *REV3L* exon 13,  
405 showing merged RNA-seq tracks from HEK293 cells treated with control siRNA (“Control siRNA#1”  
406 and “Control siRNA#2”), two separate siRNAs against *RBMX* (“RBMX siRNA#1” and “RBMX  
407 siRNA#2”), siRNA against *METTL3* (“*METTL3* siRNA”) and against *METTL14* (“*METTL14* siRNA”), as  
408 well as *RBMX* PAR-CLIP. RNA-seq data from (26). **(B-C)** Snapshots from IGV browser (37) over the  
409 *RIF1* and *ASPM* genes showing merged RNA-seq tracks from triplicate MDA-MB-231 cells taken after  
410 either *RBMX* depletion (“RBMX siRNA”) or control treatment (“Control siRNA”), as well as *RBMX*  
411 PAR-CLIP from (26). Splicing junctions between exons are represented with dotted lines. **(D-E)** Pie  
412 charts representing the proportion of exons that are downregulated upon *RBMX* depletion (DEXseq2  
413 control/knock-down fold-change > 1) with two separate siRNAs in HEK293 cells and are either larger  
414 (red slice) or shorter (grey slice) than the median size of human exons. Data from (26).

415 RBMX represses upstream transcriptional termination sites within key genes  
416 important for genome stability.

417 Previous data have implicated RBMX with a role in splicing regulation (27). However, the  
418 above analyses additionally predicted that RBMX controls selection of transcription  
419 termination events for a panel of 64 genes ( Figure 1 – Source Data 2 and Figure 5 – Source  
420 Data 1). Interestingly, *BRCA2* was identified as one of these differentially terminated mRNA  
421 transcripts (Figure 1D). Consistent with this, more detailed observation showed that RNA-  
422 seq reads asymmetrically mapped up to the first part of the ~5Kb long exon 11 of the  
423 *BRCA2* gene, with reduced read density for the remainder of this exon as well as all  
424 downstream exons (Figure 5A). Most of the premature termination events identified in our  
425 analysis occurred at termination sites previously mapped by high-throughput studies (54),  
426 while 7 events appeared to involve novel termination sites including within *BRCA2* (Figure  
427 5B). Despite the lack of previously detected polyadenylation events at the site of the *BRCA2*  
428 exon 11 where RNA-seq reads dropped in RBMX-depleted cells, this genomic region does  
429 contain a canonical consensus sequence for polyadenylation (Figure 5C) (55–57).  
430 Furthermore, visual inspection of an alignment file that compares the RNA-seq reads from  
431 cells treated with RBMX siRNA to control siRNA using the bamcompare tool from deepTools  
432 v3.5.0 (58) confirmed reduction of RNA-seq reads after this putative polyA site upon RBMX  
433 depletion (Figure 5C). Consistent with this, RT-PCR analysis showed that the relative  
434 abundance of a PCR product spanning the premature termination site, normalised over a  
435 region upstream, was significantly reduced in RBMX-depleted cells compared to control  
436 (Figures 5D, E). This suggests that RBMX prevents premature transcription termination  
437 within *BRCA2* exon 11.

438

439 In order to better understand the impact of RBMX knock-down on premature transcription  
440 termination, we used the IGV genome browser (37), annotation on previously mapped polyA  
441 sites (54) and the bamcompare comparative track (58). We visually defined a termination  
442 window (TW) within these genes where RNA-seq tracks drop in RBMX knock-down  
443 compared to control. We then quantified RNA-seq reads upstream (“before”) and  
444 downstream (“after”) of the TW (Figure 5F, top panel). MDA-MB-231 cells depleted for  
445 RBMX revealed a dramatic and significant reduction of RNA density after the TW. This  
446 indicates defective production of full-length RNAs for this panel of genes after RBMX  
447 depletion (Figure 5F, bottom panel). To quantitate the contribution of RBMX on transcription  
448 termination we defined a Termination Index (TI) as the ratio between the RNA-seq density  
449 over the region downstream of TW and the region upstream of TW (Figure 5G). Smaller TI  
450 values are associated with lower RNA-seq density at the end of the gene, indicative of

451 premature transcription termination. In agreement with our hypothesis, a Wilcoxon paired  
452 test showed that average TI over the genes identified by our analyses was significantly  
453 decreased in RBMX-depleted cells compared to control (Figure 5H, and Figure 5 – Source  
454 Data 1). Almost all 64 genes in this panel displayed significant reduction in TI across all  
455 biological replicates as measured by t-test with multiple test correction (Figure 5 – Figure  
456 Supplement 1A, Figure 5 – Source Data 1). This same analysis applied to published RNA-  
457 seq data (26) confirmed this novel RBMX role in suppressing upstream poly(A) sites in  
458 HEK293 cells, where depletion of RBMX resulted in a similar, significant reduction of RNA-  
459 seq reads after TW and reduced TI values compared to control (Figure 5I, Figure 5 – Figure  
460 Supplements 1B, C and Figure 5 – Source Data 1). However, the same was not observed  
461 after depletion of either of the m6A methyltransferases METTL3 and METTL14 (26) (Figure  
462 5I, Figure 5 – Figure Supplements 1 B, C and Figure 5 – Source Data 1), showing that  
463 RBMX function in transcriptional termination is m6A-independent.

464

465 The above results reveal that RBMX contributes to full-length mRNA production by  
466 preventing early transcription termination within a subset of genes. Some of these premature  
467 termination events involve use of alternative upstream terminal exons, such as within the  
468 *ASPH* Aspartate Beta-Hydroxylase oncogene (59) (Figure 5 – Figure Supplement 2A), or  
469 upstream cryptic terminal exons, for example within the *ABLIM3* gene (Figure 5 – Figure  
470 Supplement 2B). However, a number of other premature termination events occurred at  
471 polyA sites localised within ultra-long exons in genes involved in replication fork activity.  
472 These ultra-long exons were found within *BRCA2* (4932nt long exon 11), *FANCM* (1905nt  
473 long exon 14) (Figure 5 – Figure Supplement 3A); and *GEN1* (RBMX represses an  
474 alternative upstream polyA sites within the terminal exon of the gene) ( Figure 5 – Figure  
475 Supplement 3B). RBMX also enables full-length inclusion of ultra-long exons within genes  
476 involved in other aspects of genome stability. These include *RESF1* (Retroelement Silencing  
477 Factor 1, 5109nt long exon 4) that negatively regulates endogenous retroviruses (60) (61)  
478 (Figure 5 – Figure Supplement 3C); *ASPM* (*Abnormal spindle-like microcephaly-associated*)  
479 that is essential for normal mitotic spindle function (62) (63) (Figure 5 – Figure Supplement  
480 3D); and *KNL1* (*kinetochore scaffold 1*) that is essential for spindle-assembly checkpoint  
481 signalling and for correct chromosome alignment (64) (Figure 5 – Figure Supplement 3E).

482



Figure 5

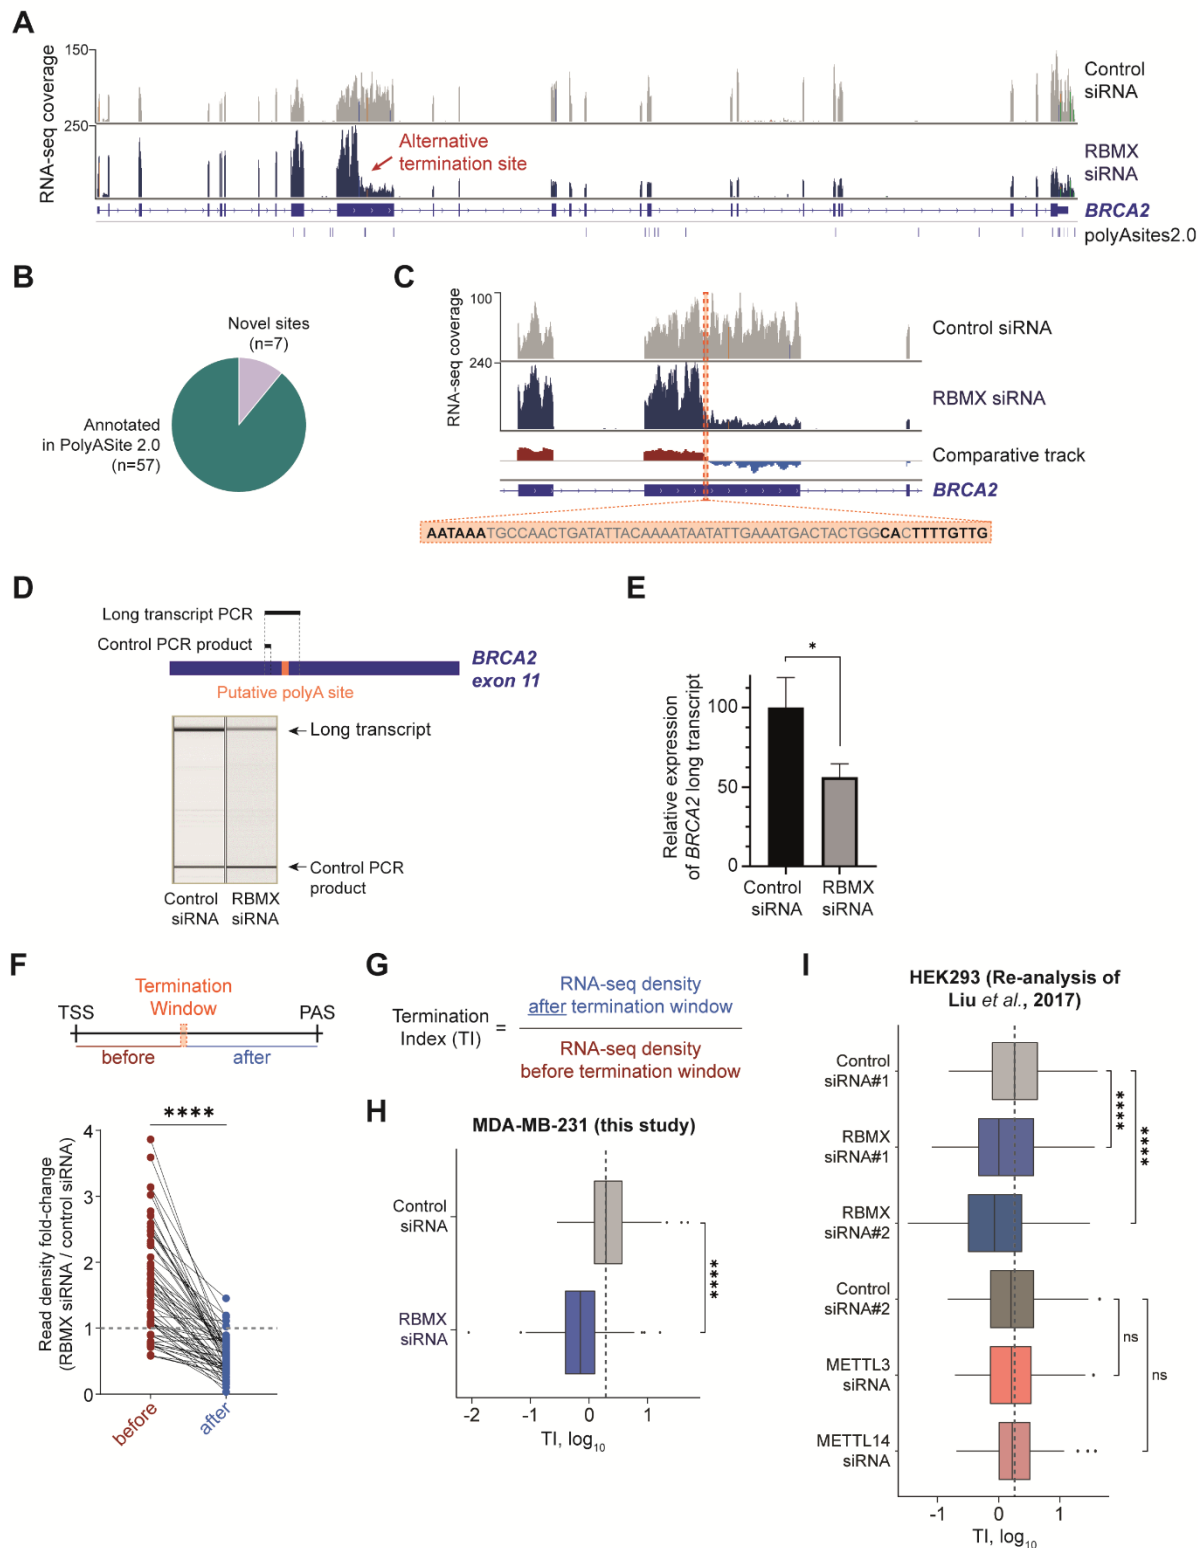

483

484

485 **Figure 5. Depletion of RBMX leads to significantly strong reduction of full-length mRNA**  
486 **transcripts from genes involved in genome maintenance.**

487 **(A)** Snapshots from IGV browser (37) over the *BRCA2* gene showing merged RNA-seq tracks from  
488 triplicate MDA-MB-231 cells taken after either *RBMX* depletion (“RBMX siRNA”) or control treatment  
489 (“Control siRNA”). Previously identified polyadenylation (polyA) sites that are annotated in PolyASite

490 2.0 (54) are shown below the RNA-seq tracks. A putative novel termination sites within *BRCA2* that is  
491 preferentially used in RBMX-depleted cells is indicated with red arrows. **(B)** Pie chart representing the  
492 proportion of premature transcription termination events that occur upon RBMX depletion at sites  
493 already annotated in PolyASite 2.0 (54). **(C)** Snapshot from IGV browser (37) over *BRCA2* exons 10-  
494 12 showing merged RNA-seq tracks from MDA-MB-231 cells taken after either *RBMX* depletion  
495 (“*RBMX* siRNA”) or control treatment (“Control siRNA”), as well as a comparative track produced as  
496 ratio between *RBMX* siRNA and Control siRNA tracks using the bamcompare tool from  
497 deepTools3.5.0 (58). Specifically, positive (*RBMX* siRNA)/(Control siRNA) values are coloured in red  
498 while negative (*RBMX* siRNA)/(Control siRNA) values are coloured in blue. The putative  
499 polyadenylation signal identified within *BRCA2* exon 11 is highlighted in orange. **(D)** Upper panel,  
500 schematic representation of PCR products amplified from regions located either upstream or across  
501 the putative polyA site within *BRCA2* exon 11. Bottom panel, Representative capillary gel  
502 electrophoretograms showing RT-PCR analysis of the two PCR products from *BRCA2* exon 11. **(E)**  
503 Bar chart associated with (D) shows the relative expression of the full-length *BRCA2* isoform  
504 (encompassing the putative polyA site) compared to control PCR amplification (upstream the putative  
505 polyA site), using data from three biological replicates. The error bars show standard error. \*, p-value  
506 < 0.5 as calculated by t-test by 2-tailed t-test assuming equal variance. **(F)** Upper panel, schematic  
507 representation of the region that displays drop in RNA-seq reads upon RBMX knock-down  
508 (termination window, TW). The region “before” TW is defined from transcription start site (TSS) to the  
509 5’ edge of TW and the region “after” TW is defined from the 3’ edge of TW to the last polyadenylation  
510 signal (PAS) for all genes in Figure 5 – Source Data 1. Lower panel, dot plot representing the fold-  
511 change in RNA-seq read density between cells treated with *RBMX* siRNA and control siRNA over the  
512 regions before (red dots) and after (blue dots) TW. Black lines connecting the two groups of dots  
513 indicate the individual change between the two regions for all genes in analysis. A fold-change equal  
514 to 1 (RNA density in *RBMX*-depleted cells = RNA density in control cells) is indicated with dashed  
515 grey line as reference. \*\*\*\*, p-value < 0.0001 as calculated by Wilcoxon matched-pairs signed rank  
516 test. **(G)** formula for calculating Termination Index (TI) from RNA-seq reads before and after TW. **(H)**  
517 Boxplot analysis of TI for transcripts in Figure 5 – Source Data 1, averaged across three biological  
518 replicates for RNA-seq read densities measured from MDA-MB-231 cells treated with either control  
519 siRNA or siRNA against *RBMX*. Plot was produced using ggplot2 v.3.3.2 on R v.4.0.2 (41). Median TI  
520 for control cells is indicated with dashed grey line as reference.\*\*\*\*, p-value < 0.0001 as calculated by  
521 Wilcoxon matched-pairs signed rank test. **(I)** Boxplot analysis as in (H) for the indicated samples  
522 analysed from HEK293 (26). Median TI for the first sample of control cells is indicated with dashed  
523 grey line as reference.\*\*\*\*, p-value < 0.0001 and ns, non-significant as calculated by Wilcoxon  
524 matched-pairs signed rank test.

525

Figure 5 – Figure Supplement 1

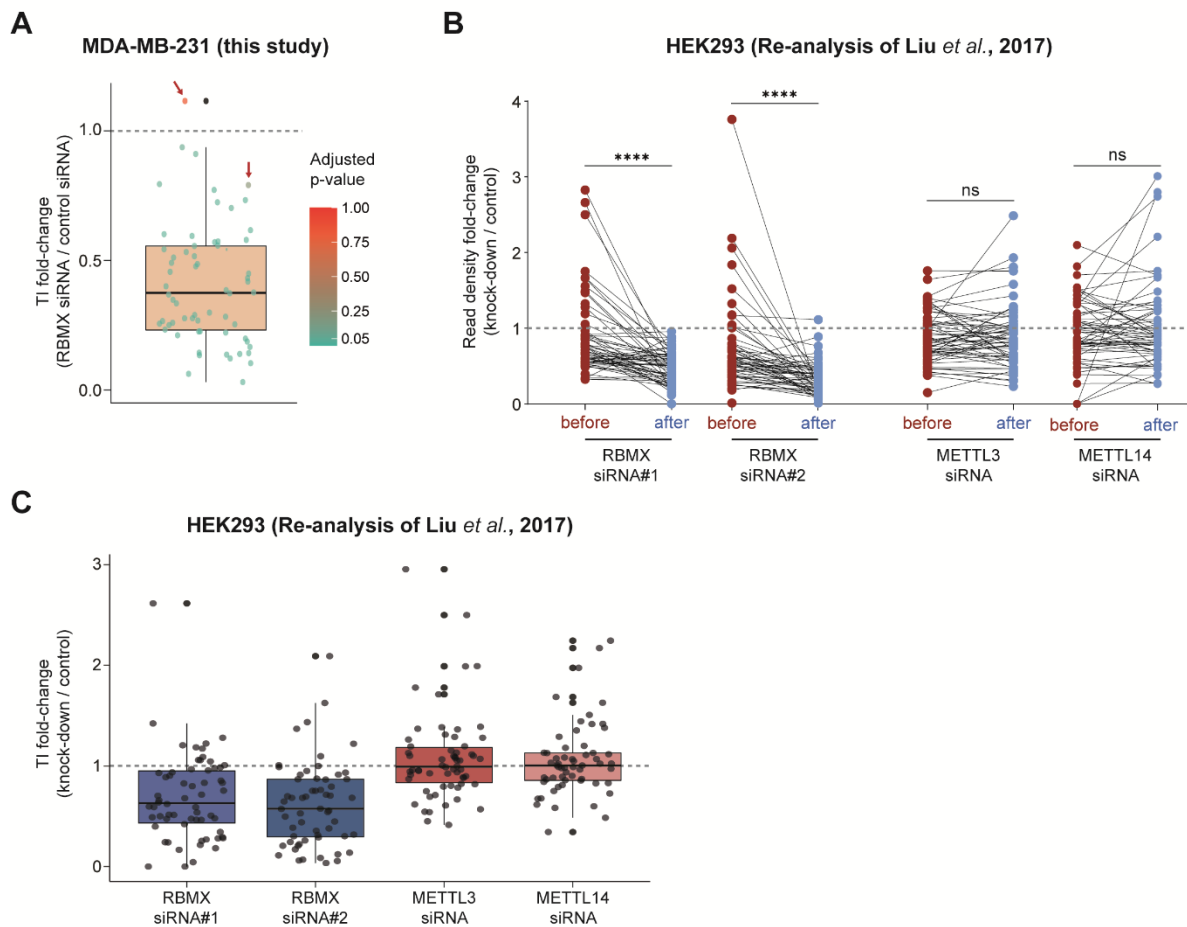

526

527

528 **Figure 5 – Figure Supplement 1. (A)** Boxplot analysis shows the TI fold-change between cells  
 529 treated with RBMX siRNA ( $TI_{(RBMX\ siRNA)}$ ) and cells treated with control siRNA ( $TI_{(control\ siRNA)}$ ), for all  
 530 transcripts in Figure 5 – Source Data 1.  $TI_{(RBMX\ siRNA)} / TI_{(control\ siRNA)}$  ratios were calculated after  
 531 averaging TI values from biological replicates for both samples. The overlapping jitter plot shows  
 532 individual  $TI_{(RBMX\ siRNA)} / TI_{(control\ siRNA)}$  fold-change ratios. These are coloured according to the adjusted  
 533 p-value (FDR method) calculated after t-test with multiple test correction across biological triplicates.  
 534 The only two genes that show adjusted p-values above 0.05 are indicated with red arrows. Plot was  
 535 produced using ggplot2 v.3.3.2 on R v.4.0.2 (41). **(B)** Dot plot analysis as in Figure 5F for the  
 536 indicated samples analysed from HEK293 (26). \*\*\*\*, p-value < 0.0001 and ns, non-significant, as  
 537 calculated by Wilcoxon matched-pairs signed rank test. **(C)** Boxplot analysis for TI fold-change was  
 538 performed as in (A) for RNA-seq data from HEK293 (26). Jitter plot is shown as monochrome  
 539 because t-test with multiple test correction could not be performed across the two only biological  
 540 replicates provided from this dataset (26).

541

Figure 5 – Figure Supplement 2

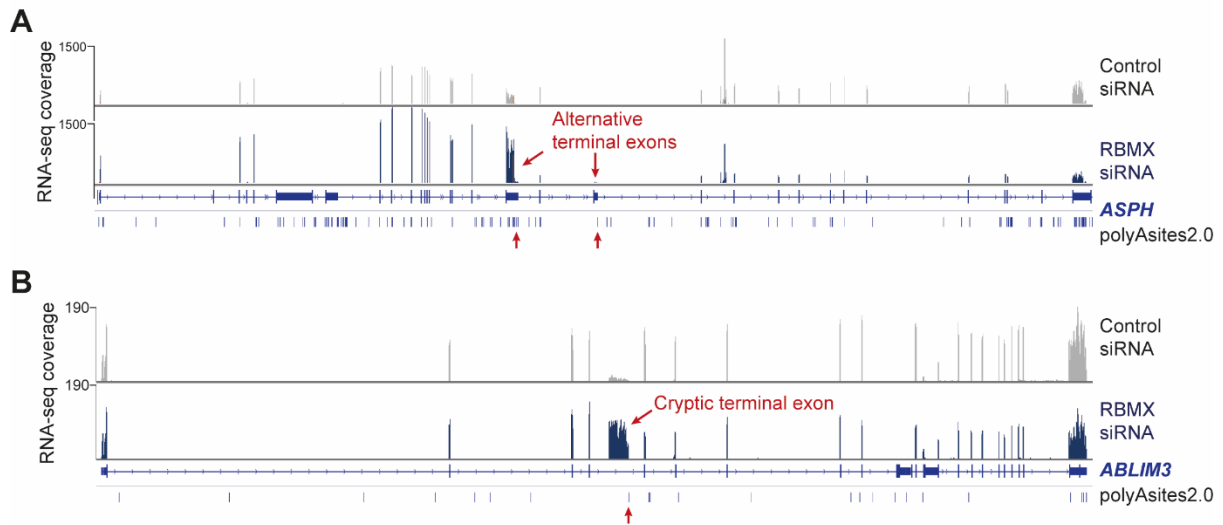

542

543 **Figure 5 – Figure Supplement 2. (A-B)** Snapshots from IGV browser (37) over the *ASPH* (A) and  
544 *ABLIM3* (B) genes showing merged RNA-seq tracks from triplicate MDA-MB-231 cells taken after  
545 either *RBMX* depletion (“*RBMX* siRNA”) or control treatment (“Control siRNA”). Previously identified  
546 polyadenylation (polyA) sites annotated in PolyASite 2.0 (54) are shown for all tracks. Alternative  
547 upstream polyA sites within *ASPH* (A) and a cryptic upstream terminal exon within *ABLIM3* (D)  
548 preferentially used in *RBMX*-depleted cells are indicated with red arrows.

549

Figure 5 – Figure Supplement 3

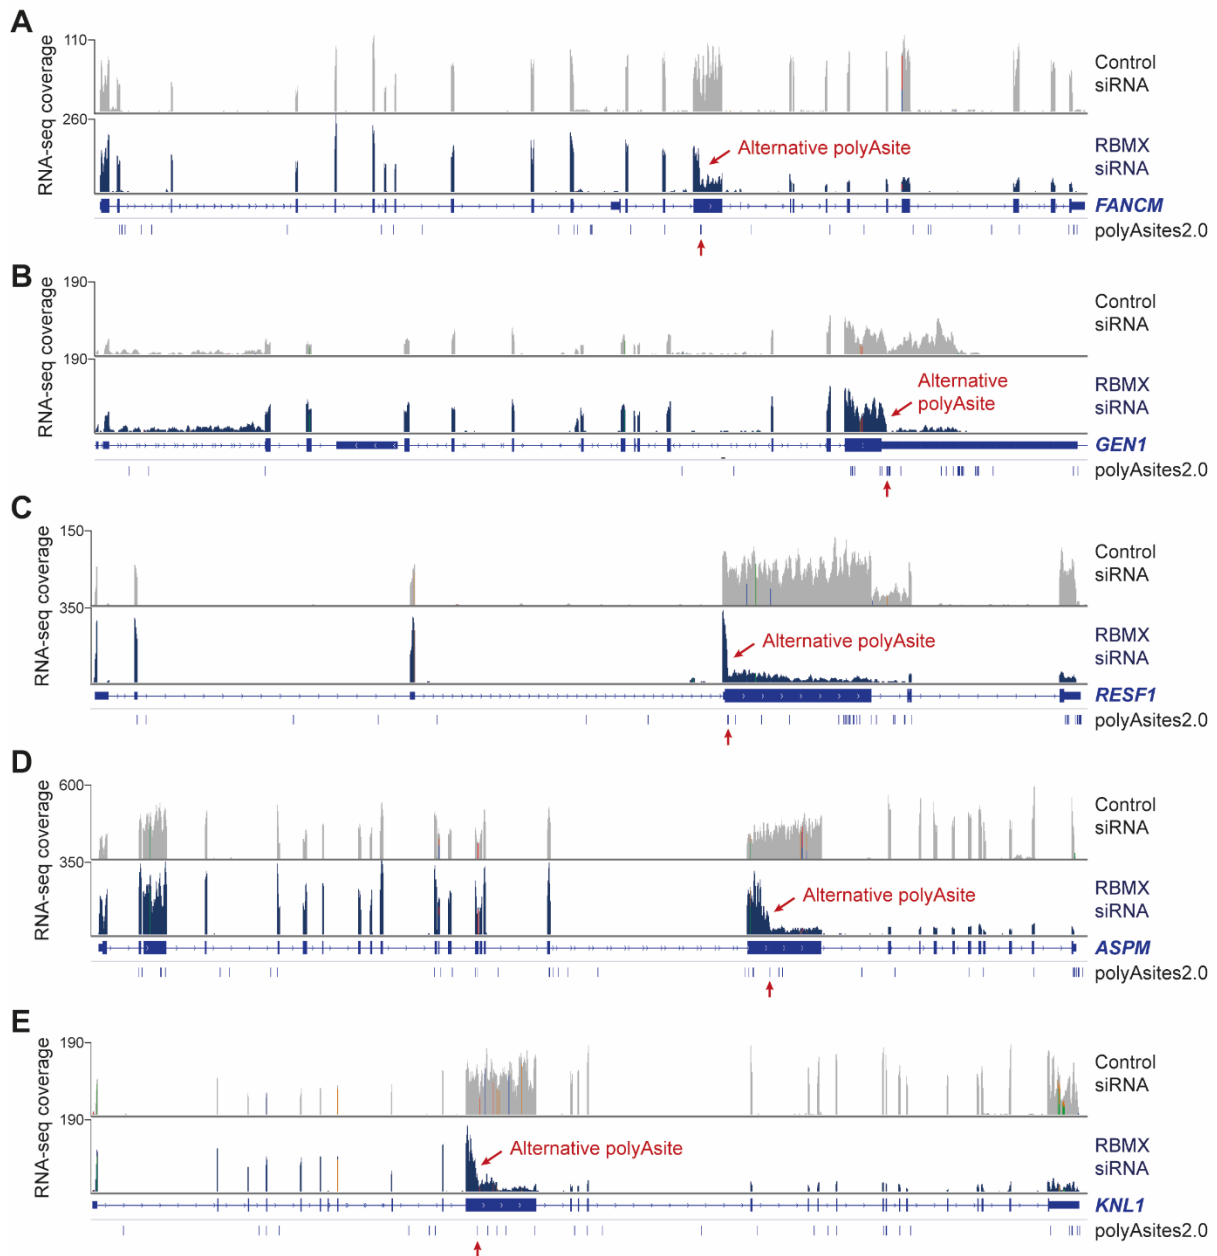

550

551 **Figure 5 – Figure Supplement 3. (A-D)** Snapshots from IGV browser (37) over the *FANCM* (A),  
552 *GEN1* (B), *RESF1* (C), *ASPM* (D) and *KNL1* (E) genes showing merged RNA-seq tracks from  
553 triplicate MDA-MB-231 cells taken after either *RBMX* depletion (“*RBMX* siRNA”) or control treatment  
554 (“Control siRNA”). Previously identified polyadenylation (polyA) sites annotated in PolyASite 2.0 (54)  
555 are shown for all tracks. Alternative upstream polyA sites that are preferentially used in *RBMX*-  
556 depleted cells are indicated with red arrows.

557

558 RBMX expression levels control gene networks involved in replication fork activity and  
559 DNA damage.

560 The above data showed that RBMX is required for productive RNA processing of genes  
561 important for replication fork activity, including *ETAA1*, *REV3L*, *ATRX*, *FANCM* and *BRCA2*.  
562 However, depletion of RBMX in U2OS cells caused no defects in S phase of the cell cycle  
563 (21), and we observed a similar situation in MDA-MB-231 cells using Fluorescence-activated  
564 Cell Sorting (FACS) (Figure 6 – Figure Supplements 1A, B). Altogether, these results  
565 indicate that RBMX may modulate expression of other genes that can enable cell cycle  
566 progression to continue when the levels of key replication fork proteins drop. To further  
567 analyse this phenomenon, we examined the impact of RBMX depletion on the cellular  
568 transcriptome by analysing changes in RNA levels detected by our RNA-seq in MDA-MB-  
569 231 cells. Overall, 1596 genes showed an increased fold-change of at least 1.5  
570 ( $\log_2\text{FoldChange} = 0.6$ ), and 1691 showed a decreased fold-change of 0.65  
571 ( $\log_2\text{FoldChange} = -0.6$ ) or less of RNA levels in cells depleted for RBMX compared to  
572 control (adjusted p-value  $\leq 0.05$ ) (Figure 6A).

573  
574 To identify patterns of gene expression that change on RBMX depletion we then used Gene  
575 Set Enrichment Analysis (GSEA), which takes into account fold-changes in RNA levels  
576 measured by RNA-seq (65). Strikingly, 14/20 of the most significant up-regulated pathways  
577 identified after RBMX depletion were involved in DNA replication and DNA damage  
578 response during S phase of the cell cycle, including activation of ATR in response to  
579 replication stress (Figure 6B) (15). Transcripts regulated by the E2F transcription factor have  
580 been reported to be maintained at high levels in response to replication stress (66). The  
581 gene sets up-regulated in response to RBMX depletion include some of these transcripts,  
582 specifically important regulators of S phase such as the cell division cycle proteins *CDC6*,  
583 *CDC7*, *CDC25A*, *CDC45*, the cyclins E1, D1 and D3, *CDKN1A* and *CDK4* (Figure 6 –  
584 Source Data 1). Moreover, other up-regulated genes encode important components of the  
585 replication machinery. These include the catalytic subunit of DNA polymerase epsilon  
586 (*POLE*) which is involved in chromosome replication and DNA damage repair; Replication  
587 Factor C2 and Replication Factor C4 (*RFC2* and *RFC4*) that are required for DNA elongation  
588 by DNA polymerases  $\delta$  and  $\epsilon$ ; and the *POLD2*, *POLD3* and *PCNA* genes that encode  
589 proteins which increase activity of DNA polymerase  $\delta$ , and help its recruitment to sites of  
590 DNA damage (Figure 6A and Figure 6 – Source Data 1). Importantly, none of these  
591 transcripts showed apparent mRNA processing defects upon depletion of RBMX. Overall,  
592 these data suggest that breast cancer cells can maintain cell cycle progression by subtly

593 modulating gene expression patterns after RBMX depletion that relate to S phase of the cell  
594 cycle.  
595

Figure 6

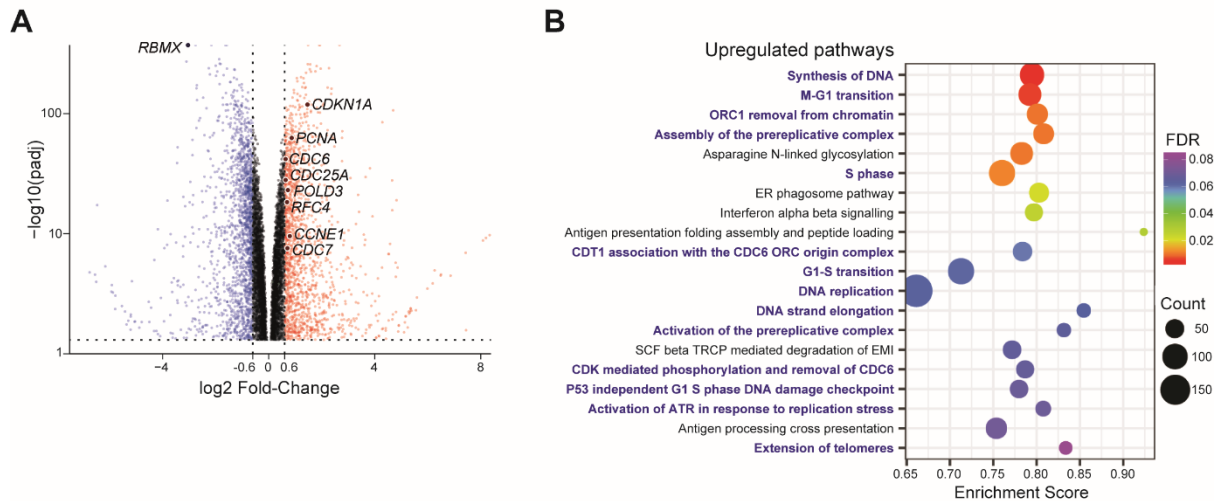

596

597 **Figure 6. Depletion of RBMX from human breast cancer cells induces a gene expression**  
 598 **signature related to DNA replication and repair. (A)** Volcano plot showing changes in transcript  
 599 levels after depletion of RBMX, as measured by RNA-seq. RNA-seq data were analysed using  
 600 DESeq2 v.1.16.1 (43) and genes with either no RNA-seq reads or an adjusted p-value<0.05 were  
 601 excluded. Blue dots, transcripts with a log2 Fold-Change between RBMX siRNA and control siRNA  
 602 lower than -0.6 (Fold-Change < 0.66, *i.e.* at least 34% reduction). Red dots, transcripts with a log2  
 603 Fold-Change between RBMX siRNA and control siRNA higher than 0.6 (Fold-Change > 1.5, *i.e.* at  
 604 least 50% increase). padj, adjusted p-value. Fold-changes in RNA levels over *RBMX* and genes  
 605 discussed in the main text are highlighted. **(B)** Gene Set Enrichment Analysis (GSEA) was performed  
 606 using the Broad Institute GSEA software (65) to identify the top 20 upregulated REACTOME  
 607 pathways after RBMX depletion. Pathways involved in DNA replication are highlighted in blue. FDR,  
 608 False discovery rate. Count, number of genes.



609

Figure 6 – Figure Supplement 1

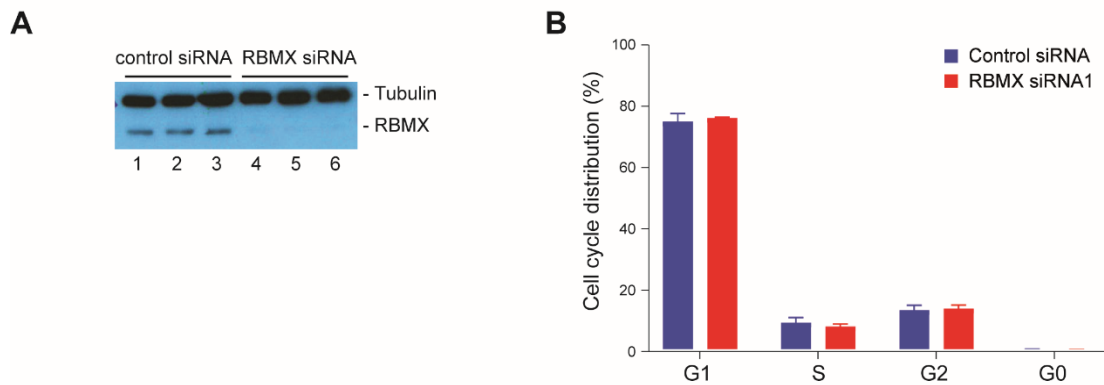

610

611

612

613

614

615

616

**Figure 6 – Figure Supplement 1. (A)** Western blot analysis confirming reduction in RBMX protein levels in MDA-MB-231 cells after siRNA-mediated depletion of *RBMX*. Levels of RBMX protein were depleted around 90% when quantitated relative to tubulin. Cells from the same samples were analysed by flow cytometry in (B). **(B)** Flow cytometry analysis shows that siRNA-mediated depletion of *RBMX* causes no change in cell cycle distribution. Bars represent standard error from 3 biological replicates.

## 617 Discussion.

618 Here we have tested the hypothesis that RBMX controls genome stability via RNA  
619 processing. Supporting this, global analyses of RBMX-controlled mRNA processing patterns  
620 in human breast cancer cells show RBMX suppresses the use of splicing and  
621 polyadenylation sites within key genes that are crucial for genome stability (Figures 7A, B).  
622 This conclusion changes the way that we think about RBMX and DNA damage control, from  
623 a purely structural role at sites of replication fork stalling or DNA damage (15,21), to include  
624 an earlier role in gene expression patterns that regulate genome maintenance. Moreover,  
625 this better understanding of RBMX-controlled RNA processing patterns provides new  
626 molecular insights through which RBMX could operate as a tumour suppressor (4–8), and  
627 within gene expression networks in cancer cells (3).

628  
629 The RBMX-regulated RNA processing events identified in this study have largely distinct  
630 properties compared with previous reported targets (26,27) in that they: (1) include a wider  
631 spectrum of RBMX-regulated events than just skipped exons (2); are largely suppressed by  
632 RBMX; and (3) seem to be regulated by RBMX largely independent of m6A RNA  
633 modification. The RNA processing defects detected in this study are conceptually similar to  
634 those detected in the mouse testis after the genetic deletion of the *RBMX* paralog *Rbmx12*  
635 (34), which showed increased use of weak splice sites that would poison gene expression.  
636 Hence, although the actual regulated genes are different between human breast cancer cells  
637 and mouse testis, RBMX and *Rbmx12* share similar predominantly repressive activities that  
638 are important for productive gene expression.

639  
640 Replication fidelity makes a key contribution to genome stability, and depletion of RBMX  
641 causes defective ATR activation in response to replication fork stalling (15). Our data here  
642 reveal that amongst the strongest defects in RNA processing patterns in response to RBMX  
643 depletion are six genes that encode key replication fork proteins (these are ETAA1, REV3L,  
644 BRCA2, ATRX, GEN1 and FANCM, Figures 7A, B). Most importantly, these include ETAA1  
645 protein, which associates with single strand DNA at stalled replication forks, to activate ATR  
646 kinase in an independent and parallel pathway to TOPBP1 (17,45,46). ETAA1 is crucial for  
647 replication fork activity: cells directly depleted for ETAA1 protein (which also becomes  
648 virtually undetectable after RBMX protein depletion) become hypersensitive to replication  
649 stress and exhibit genome instability (45). RBMX is also required for productive expression  
650 of *REV3L*, which encodes the catalytic component of DNA polymerase  $\zeta$ . This polymerase is  
651 used to by-pass sites of DNA adduct incorporation, or difficult to replicate DNA (51). The  
652 large exon in *REV3L* that is disrupted by RBMX depletion encodes a 1386 amino acid

653 disordered peptide stretch important for efficient polymerase  $\zeta$  activity, and inactivation of  
654 REV3L causes genomic instability (51). Furthermore, RBMX represses an exon within  
655 *ATRX*, a gene encoding a protein that stabilises stalled replication forks (67). RBMX is  
656 similarly important for full-length expression of the *FANCM* gene, which encodes a DNA  
657 translocase that remodels stalled replication forks to facilitate activation of the ATR/ATRIP  
658 kinase complex (68). RBMX promotes full-length UTR expression from the *GEN1* gene,  
659 which encodes a protein that resolves stalled replication forks (69). RBMX is also critical for  
660 full-length expression of the *BRCA2* gene that protects stalled replication forks from  
661 degradation (70,71). Finally, we detect a subtle upregulation of other genes involved in DNA  
662 replication and DNA damage control after RBMX depletion, which likely represents a cellular  
663 response to increased DNA replication fork stalling (66). Previous studies have shown that  
664 Chk1 kinase inhibits the E2F6 transcriptional repressor to promote upregulation of cell-cycle  
665 transcriptional programmes in response to replication stress (66). However, further analysis  
666 will be required to clarify the mechanisms of compensation that maintain replication fork  
667 stability in the absence of RBMX. We also cannot exclude that shorter proteins are made  
668 from truncated mRNAs after RBMX-depletion that might interfere with the function of the full-  
669 length protein isoforms.

670

671 Although RBMX has previously been associated with splicing regulation, the biggest group  
672 of RNA processing events that we identified as repressed by RBMX are upstream polyA  
673 sites and alternative upstream terminal exons. The selection of polyA sites and alternative  
674 splice sites both depend on assembly of RNA protein complexes, and are driven by  
675 recognition of consensus sequences within pre-mRNAs. RBMX is part of the hnRNP family  
676 of proteins, many of which coat RNA and so may block RNA processing signals within pre-  
677 mRNAs (72). RBMX binding to pre-mRNA may hence act as a general signal to block use of  
678 aberrant RNA processing sites embedded in transcripts. Current data are consistent with a  
679 model by which RBMX could facilitate splicing inclusion and full-length transcription of  
680 important protein coding genes by sterically masking cryptic mRNA processing sites (Figure  
681 7A). This model is supported by the presence of multiple RBMX binding sites (26) across  
682 several of these large exons included within *REV3L*, *ATRX*, *RIF1*, *ASPM*. RBMX may also  
683 operate in conjunction with other RNA binding proteins to bind RNA. This latter mechanism  
684 might be important for *ETAA1* exon 5. Although Tra2 $\beta$  associates to *ETAA1* RNA near the  
685 cryptic splice site within exon 5 (see Supplementary Figure 4), analysis of published PAR-  
686 CLIP (26) revealed that RBMX might not do the same. Co-transfection experiments indicate  
687 that the RBMX relies on Tra2 $\beta$  binding to RNA to correctly process *ETAA1* mRNA. One  
688 intriguing possibility might be that RBMX interacts with Tra2 $\beta$  bound to RNA, creating a

689 complex that sterically prevents the spliceosome to access the internal 3' splice site within  
690 *ETAA1* exon 5.

691

692 Our data also provide insight into how ultra-long exons are processed. In mammals, exons  
693 are recognised by a process called exon definition, in which U1 and U2 snRNPs of the  
694 spliceosome interact with the 5' and 3' splice sites, and are stabilised by interactions with  
695 nuclear RNA binding proteins attached within and nearby to exon sequences (73). The  
696 median size of human exons is approximately 129 base pairs (bp), however a large number  
697 of genes contain exons that can reach several kilobases (kb) in length. To what extent  
698 specific mechanisms exist to allow the spliceosome to recognize splice sites that are far  
699 apart, thus enabling splicing inclusion of ultra-long exons, is not well understood. Our data  
700 here indicate that RBMX plays a key role in suppressing the use of aberrant RNA processing  
701 signals that would interrupt the inclusion of long exons. Long exons might be particularly  
702 destabilised by loss of RBMX, since their increased length would make it more likely to  
703 contain short sequence motifs that could be utilised by other RNA processing pathways.  
704 Moreover, deficiencies in proper RNA processing pathways of long exons might contribute  
705 to developmental defects and human disease associated with RBMX deficiency. In fact,  
706 *RBMX* is mutated in the human X-linked mental retardation Shashi syndrome (14), and  
707 individual mutation of genes that rely on RBMX for productive expression can cause mental  
708 retardation (*ATRX*) (74) microcephaly (*KNL1* and *ASPM*) (75,76). Consistent with this  
709 hypothesis, loss of RBMX also affects brain development in zebrafish (13).

710

Figure 7

A

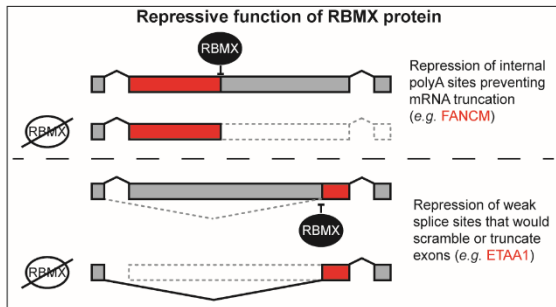

**RBMX ensures productive expression of full-length protein isoforms that maintain genome stability at replication fork**

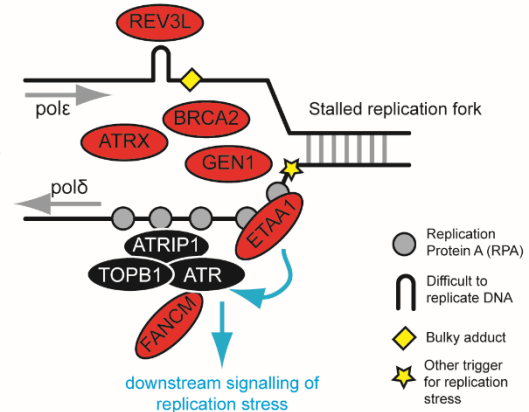

B

| Gene         | Function at replication fork                                                                                                                                                |
|--------------|-----------------------------------------------------------------------------------------------------------------------------------------------------------------------------|
| <i>ETAA1</i> | Associates with single strand DNA and activates ATR kinase in an independent and parallel pathway to TOPBP1. <b>RBMX is needed to make the full-length protein</b>          |
| <i>REV3L</i> | Catalytic component of DNA polymerase ζ, which bypasses difficult to replicate DNA. <b>RBMX is needed to make the full-length protein</b>                                   |
| <i>BRCA2</i> | Protects stalled replication forks from degradation. <b>RBMX is needed to make the full-length protein</b>                                                                  |
| <i>ATRX</i>  | ATP-dependent helicase of the SWI/SNF chromatin remodelling family that stabilises stalled replication forks. <b>RBMX ensures insertion of a peptide encoded by an exon</b> |
| <i>FANCM</i> | DNA translocase that remodels stalled replication forks to facilitate activation of the ATR/ATRIP kinase complex. <b>RBMX is needed to make the full-length protein</b>     |
| <i>GEN1</i>  | Endonuclease that resolves stalled replication forks. <b>RBMX is needed to make the full-length 3'-UTR</b>                                                                  |

711

712

713 **Figure 7. RNA processing by RBMX controls key genes for replication fork stability.**

714 **(A)** Schematic representation of the repressive function of RBMX in preventing use of cryptic mRNA  
 715 processing sites thus promoting correct replication stress response and genome maintenance. **(B)**  
 716 Schematic table indicating the function of RBMX-controlled genes shown in (A) at the replication fork.

## 717 [Materials and methods.](#)

### 718 **Cell culture and cell lines**

719 MDA-MB-231 (ATCC<sup>®</sup> HTB-26<sup>™</sup>), MCF7 (ATCC<sup>®</sup> HTB-22<sup>™</sup>), and HEK293 (ATCC<sup>®</sup> CRL-  
720 1573) cells were grown as previously described (48). Cell line validation was carried out  
721 using STR profiling according to the ATCC<sup>®</sup> guidelines. All cell lines underwent regular  
722 mycoplasma testing.

723

### 724 **siRNA knockdown**

725 RBMX transient knockdown was established using two different siRNAs targeting *RBMX*  
726 mRNA transcripts (hs.Ri.RBMX.13.1 and hs.Ri.RBMX.13.2, from Integrated DNA  
727 Technologies). Negative control cells were transfected with scramble siRNA (IDT). Cells  
728 were seeded onto 6-well plates at a confluence of approximately  $1 \times 10^6$  and incubated for  
729 24 hours. After the incubation period, 6  $\mu$ l of 10  $\mu$ M siRNA was diluted in 150  $\mu$ l of Opti-MEM  
730 which was then mixed with 6  $\mu$ l of Lipofectamine RNAiMAX also diluted in 150  $\mu$ l. The  
731 combined reaction mix was incubated at room for 5 min and then added dropwise onto the  
732 seeded cells. Transfected cells were then incubated for 72h at 37°C before harvesting.

733

### 734 **RNA-seq**

735 RNA was extracted from cells using RNeasy Plus Mini Kit (Qiagen) following manufacturer's  
736 instructions and re-suspended in nuclease-free water. RNA samples were DNase treated  
737 (Invitrogen). Pair-end sequencing was done initially for two biological samples, one of  
738 negative control siRNA treated MDA-MB-231 cells and one of RBMX siRNA treated cells,  
739 using an Illumina NextSeq 500 instrument. This RNAseq data is deposited at GEO  
740 (accession GSE158770). Adapters were trimmed using trimmomatic v0.32. Three additional  
741 biological repeats of negative control and RBMX siRNA treated MDA-MB-231 cells were  
742 then sequenced using an Illumina HiSeq 2000 instrument. The base quality of raw  
743 sequencing reads was checked with FastQC (77). RNA-seq reads were mapped to the  
744 human genome assembly GRCh38/hg38 using STAR v.2.4.2 (78) and subsequently  
745 quantified with Salmon v. 0.9.1 (79) and DESeq2 v.1.16.1 on R v.3.5.1 (43). All snapshots  
746 indicate merged tracks produced using samtools (80) and visualised with IGV (37) unless  
747 specified.

748

### 749 **Identification of splicing changes**

750 Initial comparison of single individual RNA-seq tracks from RBMX-depleted and control cells  
751 was carried out using MAJIQ (36), which identified 596 unique local splicing variations (LSV)  
752 at a 20% dPSI minimum cut off from 505 different genes potentially regulated by RBMX.

753 These LSVs were then manually inspected using the RNA-seq data from the second RNA  
754 sequencing of biological replicates for both RBMX-depleted and control cells, by visual  
755 analysis on the UCSC browser (81) to identify consistent splicing changes that depend on  
756 RBMX expression. The triplicate RNA-seq samples were further analysed for splicing  
757 variations using SUPPA2 (35), which identified 6702 differential splicing isoforms with p-  
758 value < 0.05. Predicted splicing changes were confirmed by visual inspection of RNA-seq  
759 reads using the UCSC (81) and IGV (37) genome browsers. Splice site strength at *ETAA1*  
760 exon 5 were calculated using MaxEntScan::score3ss  
761 ([http://hollywood.mit.edu/burgelab/maxent/Xmaxentscan\\_scoreseq\\_acc.html](http://hollywood.mit.edu/burgelab/maxent/Xmaxentscan_scoreseq_acc.html))

762

### 763 **RNA extraction and cDNA synthesis for transcript isoform analysis.**

764 RNA was extracted using standard Trizol extraction protocol and DNase treated using DNA-  
765 free kit (Invitrogen). The RNA from siRNA-treated cells was extracted using standard Trizol  
766 RNA extraction (Life Technologies) following manufacturer's instructions. cDNA was  
767 synthesized from 500 ng total RNA in 10 µl reactions using Superscript VILO cDNA  
768 synthesis kit (Invitrogen) following manufacturer's instructions. To analyse the splicing  
769 profiles of the alternative events primers were designed using Primer 3 Plus and the  
770 predicted PCR products were confirmed using the UCSC *In-Silico* PCR tool. *ETAA1*  
771 transcript isoform containing the long exon 5 was amplified by RT-PCR using primers 5'-  
772 GCTGGACATGTGGATTGGTG-3' and 5'-GTGCTCCAAAAGCCTCTGG-3', while *ETAA1*  
773 transcript isoform containing the short exon 5 was amplified using primers 5'-  
774 GCTGGACATGTGGATTGGTG-3' and 5'-GTGGGAGCTGCATTTACAGATG-3'. RT-PCR  
775 with this second primer pair could in principle amplify also a 2313 bp product from the  
776 *ETAA1* transcript isoform containing the long exon 5, however PCR conditions were chosen  
777 to selectively analyse shorter fragments. *BRCA2* transcript isoform encompassing the  
778 putative polyA site within exon 11 and a control fragment upstream this site were amplified  
779 by multiplex RT-PCR using a forward primer 5'- TCAGGTAGACAGCAGCAAGC-3' and two  
780 reverse primers, respectively 5'-TCCCTCCTTCATAAACTGGCC-3' and 5'-  
781 AACCCCACTTCATTTTCATCTGTT-3'. All PCR reactions were performed using GoTaq® G2  
782 DNA polymerase kit from Promega. All PCR products were examined using the QIAxcel®  
783 capillary electrophoresis system 100 (Qiagen).

784

### 785 **Western blot analyses**

786 Harvested cells treated with either control siRNA or siRNA against RBMX were resuspended  
787 in 100mM Tris HCL, 200mM DTT, 4% SDS, 20% Glycerol, 0.2% Bromophenol blue, then  
788 sonicated and heated to 95°C for 5 minutes. Protein separation was performed by SDS-  
789 page on a 10% acrylamide gel. Proteins were then transferred to a nitrocellulose membrane,

790 incubated in blocking buffer (5% Milk in 2.5% TBS-T) and stained with primary antibodies  
791 diluted in blocking buffer to the concentrations indicated below, at 4°C over-night. After  
792 incubation the membranes were washed three times with TBS-T and incubated with the  
793 secondary antibodies for 1 hour at room temperature. Detection was carried out using the  
794 Clarity™ Western ECL Substrate (GE Healthcare Systems) and developed using medical X-  
795 ray film blue film in an X-ray film processor developer. The following primary antibodies were  
796 used: anti-RBMX (Cell Signalling, D7C2V) diluted 1:1000, anti-SGO2 (Bethyl Laboratories,  
797 A301-261A) diluted 1:1000, anti-ETAA1 (Sigma, HPA035048) diluted 1:1000, anti-Tubulin  
798 (Abcam, ab18251) diluted 1:2000 and anti- beta-actin (Abcam, ab5441) diluted 1:1000.

799

### 800 **Minigene Experiments**

801 A genomic region containing the weak 3' splice site within *ETAA1* exon 5 and flanking  
802 sequences were PCR amplified from human genomic DNA using the primers ETAA11295F  
803 (5'-AAAAAAAAACAATTGGAACATGGAGCCAACTAACTC-3') and ETAA11295R (5'-  
804 AAAAAAAAAACAATTGTGATAGAATGGAGACTTGGGGA-3'), and cloned into pXJ41 (47).  
805 Splicing patterns were monitored after transfection into HEK293 cells with expression  
806 constructs encoding GFP, RBMX-GFP, RBMXL2-GFP, or Tra2β-GFP or deletion variants of  
807 the above plasmids as previously described (32,50). Splicing analysis was carried out in  
808 HEK293 cells after lipofectamine 2000 (Invitrogen) transfection of plasmids. RNA was  
809 extracted with TRIzol (Invitrogen), and analysed using a one-step RT-PCR (PCR with  
810 reverse transcription) kit from Qiagen, both using the standard protocol. RT-PCR  
811 experiments used 100 ng of RNA in a 5-µl reaction using a multiplex RT-PCR using primers:  
812 5'-GCTGGACATGTGGATTGGTG-3', 5'-GTGGGAGCTGCATTTACAGATG-3' and 5'-  
813 GTGCTCCAAAAGCCTCTGG-3'. Reactions were analysed and quantified by capillary gel  
814 electrophoresis.

815

### 816 **Transcription termination analyses**

817 Termination widows (TW) for all genes in Figure 5 – Source Data 1, which appear  
818 prematurely terminated upon treatment with RBMX siRNA, were defined as the regions  
819 where RNA-seq reads drop on tracks from RBMX-depleted cells but not on tracks from  
820 control cells. Confirmation of TW was carried out by visual inspection of a comparative  
821 alignment track generated using the bamcompare tool from deepTools v3.5.0 (58) on IGV  
822 browser (37). Subsequently, a .SAF annotation file was built to define the regions “before”  
823 and “after” TW for each premature transcription termination event. Specifically, regions  
824 “before” were defined from Transcription Start Site (TSS) to TW Start coordinate and regions  
825 “after” were defined from TW End coordinate to Gene End coordinate. Strand (+/-), TSS and  
826 Gene End annotations were obtained from UCSC (81). The .SAF file was used as index to



827 quantify RNA-seq reads from .BAM files using the featureCounts tool from Subread package  
828 v.2.0.1 (82). Quantification was performed on biological triplicates for RNA-seq tracks from  
829 MDA-MB-231 (this study) and on merged .BAM files from biological duplicates for RNA-seq  
830 tracks from HEK293 (26). RNA-seq densities “before” TW and “after” TW were averaged,  
831 and the statistical difference between RNA-seq densities over the two regions was  
832 calculated by Wilcoxon matched-pairs signed rank test (paired, non-parametric) after testing  
833 for normal distribution using GraphPad Prism v.8.2.1 for Windows (GraphPad Software, San  
834 Diego, California USA, [www.graphpad.com](http://www.graphpad.com)) for all samples from MDA-MB-231 (this study)  
835 and HEK293 (26). Termination Index (TI) was calculated as  $(RNA-seq\ density\ “after”)/(RNA-$   
836  $seq\ density\ “before”)$  for all events. Statistical significance of TI changes in RBMX knock-  
837 down compared to control was calculated by t-tests with multiple test correction using the  
838 qvalue package on R v.4.0.2 (83) across biological triplicates from MDA-MB-231 cells (this  
839 study), validating 62/64 transcription termination events (Figure 5 – Source Data 1). The  
840 same test could not be performed on TI calculated from HEK293 RNA-seq, as only two  
841 biological replicates are present in this dataset (26). For this reason, TI values were  
842 averaged across biological replicates for RBMX siRNA and control siRNA treated MDA-MB-  
843 231 cells, and statistical significance of TI changes upon RBMX depletion was calculated  
844 again by Wilcoxon matched-pairs signed rank test (paired, non-parametric) after testing for  
845 normal distribution using GraphPad Prism v.8.2.1 for Windows (GraphPad Software, San  
846 Diego, California USA, [www.graphpad.com](http://www.graphpad.com)). The same test was performed on TI values  
847 calculated from merged RNA-seq tracks from HEK293 (26). Finally, TI fold-change ratios  
848 were calculated as  $averageTI(RBMX\ siRNA)/averageTI(control\ siRNA)$ . All TI fold-change  
849 ratios below 1 (63/64) confirmed reduction of RNA-seq reads after TW in RBMX knock-down  
850 compared to control (Figure 5 – Source Data 1). Similar TI fold-change ratios were  
851 calculated for HEK293 cells treated with either of two RBMX siRNAs, METTL3 siRNA and  
852 METTL14 siRNA from (26) over their respective control siRNA.

853

#### 854 **Gene ontology analyses**

855 Gene Ontology Enrichment Analyses shown in dot-plots and chord-diagram were performed  
856 with GOstats v.2.54.0 (40) with a p-value cut-off of 0.05, using the Bioconductor annotation  
857 data package org.Hs.eg.db v.3.11.4 and the whole list of genes detected by RNA-seq in  
858 MDA-MB-231 (i.e. excluding genes with no RNA-seq reads in the control samples) as  
859 background universe. P-values were adjusted by hypergeometric test first, and then by false  
860 discovery rate method on R v.4.0.2 (83). The chord diagram was produced for terms with  
861 count > 4 and size < 250 using the GOplot (v1.0.2) (42). The dot-plots were produced using  
862 ggplot2 v.3.3.2. (41) focussed on representative terms that had adjusted p-value (FDR) <  
863 0.05.

864 Gene Set Enrichment Analysis (GSEA) was performed using the Broad Institute GSEA  
865 software v.3.0 (65). Genes identified by RNA-seq were ranked using  $\log_{10}(\text{p-value})$  with a  
866 negative sign for down-regulated genes and positive sign for up-regulated genes.  
867 Enrichment was queried for REACTOME pathways using the pre-ranked tool of GSEA  
868 software with 1000 permutations.

869

#### 870 **Analysis of long human exons**

871 Annotations of all human exons related to position and size were downloaded from Ensembl  
872 Genes 101 (<http://www.ensembl.org/biomart/>). Density plot was created using ggplot2  
873 v.3.3.2. (41) on R v.4.0.2.

874

#### 875 **FACS**

876 Three biological replicates of MDA-MB-231 cells treated with either control siRNA or siRNA  
877 against RBMX were washed in PBS and fixed in 70% ethanol. Cells were permeabilised  
878 using 0.1% Triton X-100 (Sigma) in PBS, then stained with 1:100 cy5-coupled MPM2  
879 (Merck/Millipore), treated with 0.2mg/ml RNaseA (Thermo Scientific) and stained with 50  
880  $\mu\text{g/ml}$  propidium iodide (Invitrogen) for 20 minutes before analysis. Samples were analysed  
881 for DNA content by flow cytometry on a BD LSRFortessa™ cell analyser. Cell cycle  
882 distribution was calculated after appropriate gating of cell populations in FL-2-Area vs FL-2-  
883 Width plot of PI fluorescence.

## Acknowledgements

884 We thank Professor Nicola Curtin and Dr. Louise Reynard for comments on the text; and  
885 Luisa Thomas Eke, Scott Naylor, Hannah Power, Rhiannon Cook, Alexa Coopersmith and  
886 Chan Sin Min for their contributions to the project.

## References

- 887 1. Hanahan D, Weinberg RA. Hallmarks of cancer: The next generation. Vol. 144, Cell.  
888 2011. p. 646–74.
- 889 2. Tam AS, Stirling PC. Splicing, genome stability and disease: splice like your genome  
890 depends on it! Vol. 65, Current Genetics. 2019. p. 905–12.
- 891 3. Climente-González H, Porta-Pardo E, Godzik A, Eyraas E. The Functional Impact of  
892 Alternative Splicing in Cancer. Cell Rep. 2017;20(9):2215–26.
- 893 4. Renieri A, Mencarelli MA, Cetta F, Baldassarri M, Mari F, Furini S, et al. Oligogenic  
894 germline mutations identified in early non-smokers lung adenocarcinoma patients.  
895 Lung Cancer. 2014;85(2):168–74.
- 896 5. Zhang D, Qu L, Zhou B, Wang G, Zhou G. Genomic variations in the counterpart  
897 normal controls of lung squamous cell carcinomas. Front Med. 2018;12(3):280–8.
- 898 6. Shin KH, Kim RH, Kim RH, Kang MK, Park NH. hnRNP G elicits tumor-suppressive  
899 activity in part by upregulating the expression of Txnip. Biochem Biophys Res  
900 Commun. 2008;372(4):880–5.
- 901 7. Shin KH, Kang MK, Kim RH, Christensen R, Park NH. Heterogeneous nuclear  
902 ribonucleoprotein G shows tumor suppressive effect against oral squamous cell  
903 carcinoma cells. Clin Cancer Res. 2006;12(10):3222–8.
- 904 8. Shin KH, Kim RH, Yu B, Kang MK, Elashoff D, Christensen R, et al. Expression and  
905 mutation analysis of heterogeneous nuclear ribonucleoprotein G in human oral  
906 cancer. Oral Oncol. 2011;47(11):1011–6.
- 907 9. Seiler M, Peng S, Agrawal AA, Palacino J, Teng T, Zhu P, et al. Somatic Mutational  
908 Landscape of Splicing Factor Genes and Their Functional Consequences across 33  
909 Cancer Types. Cell Rep. 2018;23(1):282–296.e4.
- 910 10. Antonello ZA, Hsu N, Bhasin M, Roti G, Joshi M, Hummelen P Van, et al.  
911 Vemurafenib-resistance via de novo RBM genes mutations and chromosome 5  
912 aberrations is overcome by combined therapy with palbociclib in thyroid carcinoma  
913 with BRAFV600E. Oncotarget. 2017;8(49):84743–60.
- 914 11. Matsunaga S, Takata H, Morimoto A, Hayashihara K, Higashi T, Akatsuchi K, et al.  
915 RBMX: A Regulator for Maintenance and Centromeric Protection of Sister Chromatid  
916 Cohesion. Cell Rep. 2012;1(4):299–308.
- 917 12. Cho Y, Ideue T, Nagayama M, Araki N, Tani T. RBMX is a component of the  
918 centromere noncoding RNP complex involved in cohesion regulation. Genes to Cells.  
919 2018;23(3):172–84.
- 920 13. Tsend-Ayush E, O’Sullivan LA, Grützner FS, Onnebo SMN, Lewis RS, Delbridge ML,  
921 et al. RBMX gene is essential for brain development in zebrafish. Dev Dyn.  
922 2005;234(3):682–8.
- 923 14. Shashi V, Xie P, Schoch K, Goldstein DB, Howard TD, Berry MN, et al. The RBMX  
924 gene as a candidate for the Shashi X-linked intellectual disability syndrome. Clin  
925 Genet. 2015;88(4):386–90.
- 926 15. Zheng T, Zhou H, Li X, Peng D, Yang Y, Zeng Y, et al. RBMX is required for  
927 activation of ATR on repetitive DNAs to maintain genome stability. Cell Death Differ.  
928 2020;
- 929 16. Elliott DJ, Dalgliesh C, Hysenaj G, Ehrmann I. RBMX family proteins connect the  
930 fields of nuclear RNA processing, disease and sex chromosome biology. Int J  
931 Biochem Cell Biol. 2019;108:1–6.

- 932 17. Lee YC, Zhou Q, Chen J, Yuan J. RPA-Binding Protein ETAA1 Is an ATR Activator  
933 Involved in DNA Replication Stress Response. *Curr Biol.* 2016;26(24):3257–68.
- 934 18. Elguindy MM, Kopp F, Goodarzi M, Rehfeld F, Thomas A, Chang TC, et al. PUMILIO,  
935 but not RBMX, binding is required for regulation of genomic stability by noncoding  
936 RNA NORAD. *Elife.* 2019;8.
- 937 19. Munschauer M, Nguyen CT, Sirokman K, Hartigan CR, Hogstrom L, Engreitz JM, et  
938 al. The NORAD lncRNA assembles a topoisomerase complex critical for genome  
939 stability. *Vol. 561, Nature.* 2018. p. 132–6.
- 940 20. Shin KH, Kim RH, Kang MK, Kim RH, Kim SG, Lim PK, et al. p53 promotes the fidelity  
941 of DNA end-joining activity by, in part, enhancing the expression of heterogeneous  
942 nuclear ribonucleoprotein G. *DNA Repair (Amst).* 2007;6(6):830–40.
- 943 21. Adamson B, Smogorzewska A, Sigoillot FD, King RW, Elledge SJ. A genome-wide  
944 homologous recombination screen identifies the RNA-binding protein RBMX as a  
945 component of the DNA-damage response. *Nat Cell Biol.* 2012;14(3):318–28.
- 946 22. Papasaikas P, Valcárcel J, Eu JV, Valcárcel J. Special Issue: 40 Years of TIBS The  
947 Spliceosome: The Ultimate RNA Chaperone and Sculptor. *Trends Biochem Sci*  
948 [Internet]. 2016;41(1):33–45. Available from:  
949 <http://dx.doi.org/10.1016/j.tibs.2015.11.00333>
- 950 23. Baralle FE, Giudice J. Alternative splicing as a regulator of development and tissue  
951 identity. *Vol. 18, Nature Reviews Molecular Cell Biology.* 2017. p. 437–51.
- 952 24. Ule J, Blencowe BJ. Alternative Splicing Regulatory Networks: Functions,  
953 Mechanisms, and Evolution. *Vol. 76, Molecular Cell.* 2019. p. 329–45.
- 954 25. David CJ, Manley JL. Alternative pre-mRNA splicing regulation in cancer: Pathways  
955 and programs unhinged. *Vol. 24, Genes and Development.* 2010. p. 2343–64.
- 956 26. Liu N, Zhou KI, Parisien M, Dai Q, Diatchenko L, Pan T. N6-methyladenosine alters  
957 RNA structure to regulate binding of a low-complexity protein. *Nucleic Acids Res.*  
958 2017;45(10):6051–63.
- 959 27. Zhou KI, Shi H, Lyu R, Wylder AC, Matuszek Z, Pan JN, et al. Regulation of Co-  
960 transcriptional Pre-mRNA Splicing by m6A through the Low-Complexity Protein  
961 hnRNPG. *Mol Cell.* 2019;76(1):70–81.e9.
- 962 28. Cléry A, Jayne S, Benderska N, Dominguez C, Stamm S, Allain FHT. Molecular basis  
963 of purine-rich RNA recognition by the human SR-like protein Tra2-β1. *Nat Struct Mol*  
964 *Biol.* 2011;18(4):443–51.
- 965 29. Moursy A, Allain FHT, Cléry A. Characterization of the RNA recognition mode of  
966 hnRNP G extends its role in SMN2 splicing regulation. *Nucleic Acids Res.*  
967 2014;42(10):6659–72.
- 968 30. Venables JP. RBMY, a probable human spermatogenesis factor, and other hnRNP G  
969 proteins interact with Tra2beta and affect splicing. *Hum Mol Genet.* 2002;
- 970 31. Elliott DJ, Dalgliesh C, Hysenaj G, Ehrmann I. RBMX family proteins connect the  
971 fields of nuclear RNA processing, disease and sex chromosome biology. *Int J*  
972 *Biochem Cell Biol.* 2019;108.
- 973 32. Ehrmann I, Crichton JH, Gazzara MR, James K, Liu Y, Grellscheid SN, et al. An  
974 ancient germ cell-specific RNA-binding protein protects the germline from cryptic  
975 splice site poisoning. *Elife.* 2019;8.
- 976 33. Sibley CR, Blazquez L, Ule J. Lessons from non-canonical splicing. *Nature Reviews*  
977 *Genetics.* 2016.
- 978 34. Ehrmann I, Crichton JH, Gazzara MR, James K, Liu Y, Grellscheid SN, et al. An  
979 ancient germ cell-specific RNA-binding protein protects the germline from cryptic  
980 splice site poisoning. *Elife [Internet].* 2019 Jan 24 [cited 2019 Aug 27];8. Available  
981 from: <http://www.ncbi.nlm.nih.gov/pubmed/30674417>
- 982 35. Trincado JL, Entizne JC, Hysenaj G, Singh B, Skalic M, Elliott DJ, et al. SUPPA2:  
983 fast, accurate, and uncertainty-aware differential splicing analysis across multiple  
984 conditions. *Genome Biol [Internet].* 2018 Dec 23 [cited 2019 Aug 27];19(1):40.  
985 Available from: <http://www.ncbi.nlm.nih.gov/pubmed/29571299>
- 986 36. Vaquero-Garcia J, Barrera A, Gazzara MR, Gonzalez-Vallinas J, Lahens NF,

- 987 Hogenesch JB, et al. A new view of transcriptome complexity and regulation through  
988 the lens of local splicing variations. *Elife*. 2016;5(FEBRUARY2016).
- 989 37. Robinson JT, Thorvaldsdóttir H, Winckler W, Guttman M, Lander ES, Getz G, et al.  
990 Integrative genomics viewer. Vol. 29, *Nature Biotechnology*. 2011. p. 24–6.
- 991 38. Brown RL, Reinke LM, Damerow MS, Perez D, Chodosh LA, Yang J, et al. CD44  
992 splice isoform switching in human and mouse epithelium is essential for epithelial-  
993 mesenchymal transition and breast cancer progression. *J Clin Invest*.  
994 2011;121(3):1064–74.
- 995 39. Midwood KS, Chiquet M, Tucker RP, Orend G. Tenascin-C at a glance. *J Cell Sci*.  
996 2016;129(23):4321–7.
- 997 40. Falcon S, Gentleman R. Using GOstats to test gene lists for GO term association.  
998 *Bioinformatics*. 2007;23(2):257–8.
- 999 41. Wickham H. *ggplot2 Elegant Graphics for Data Analysis (Use R!)* [Internet]. Springer.  
1000 2016. 213 p. Available from: <http://had.co.nz/ggplot2/book>
- 1001 42. Walter W, Sánchez-Cabo F, Ricote M. GOplot: An R package for visually combining  
1002 expression data with functional analysis. *Bioinformatics*. 2015;31(17):2912–4.
- 1003 43. Love MI, Huber W, Anders S. Moderated estimation of fold change and dispersion for  
1004 RNA-seq data with DESeq2. *Genome Biol*. 2014;15(12).
- 1005 44. Feng S, Zhao Y, Xu Y, Ning S, Huo W, Hou M, et al. Ewing tumor-associated antigen  
1006 1 interacts with replication protein A to promote restart of stalled replication forks. *J*  
1007 *Biol Chem*. 2016;291(42):21956–62.
- 1008 45. Bass TE, Luzwick JW, Kavanaugh G, Carroll C, Dungrawala H, Glick GG, et al.  
1009 ETAA1 acts at stalled replication forks to maintain genome integrity. *Nat Cell Biol*.  
1010 2016;18(11):1185–95.
- 1011 46. Haahr P, Hoffmann S, Tollenaere MAX, Ho T, Toledo LI, Mann M, et al. Activation of  
1012 the ATR kinase by the RPA-binding protein ETAA1. *Nat Cell Biol*. 2016;18(11):1196–  
1013 207.
- 1014 47. Bourgeois CF, Popielarz M, Hildwein G, Stevenin J. Identification of a Bidirectional  
1015 Splicing Enhancer: Differential Involvement of SR Proteins in 5' or 3' Splice Site  
1016 Activation. *Mol Cell Biol*. 1999;19(11):7347–56.
- 1017 48. Best A, James K, Dalgliesh C, Hong E, Kheirollahi-Kouhestani M, Curk T, et al.  
1018 Human Tra2 proteins jointly control a CHEK1 splicing switch among alternative and  
1019 constitutive target exons. *Nat Commun* [Internet]. 2014 Sep 11 [cited 2019 Aug  
1020 27];5:4760. Available from: <http://www.ncbi.nlm.nih.gov/pubmed/25208576>
- 1021 49. Best A, Dalgliesh C, Kheirollahi-Kouhestani M, Danilenko M, Ehrmann I, Tyson-  
1022 Capper A, et al. Tra2 protein biology and mechanisms of splicing control. In:  
1023 *Biochemical Society Transactions*. 2014. p. 1152–8.
- 1024 50. Grellscheid SN, Dalgliesh C, Rozanska A, Grellscheid D, Bourgeois CF, Stévenin J,  
1025 et al. Molecular design of a splicing switch responsive to the RNA binding protein  
1026 Tra2 $\beta$ . *Nucleic Acids Res*. 2011;39(18):8092–104.
- 1027 51. Martin SK, Wood RD. DNA polymerase  $\zeta$  in DNA replication and repair. Vol. 47,  
1028 *Nucleic acids research*. 2019. p. 8348–61.
- 1029 52. Liang L, Feng J, Zuo P, Yang J, Lu Y, Yin Y. Molecular basis for assembly of the  
1030 shieldin complex and its implications for NHEJ. *Nat Commun*. 2020;11(1).
- 1031 53. Raghunandan M, Yeo JE, Walter R, Saito K, Harvey AJ, Ittershagen S, et al.  
1032 Functional crosstalk between the Fanconi anemia and ATRX/DAXX histone  
1033 chaperone pathways promotes replication fork recovery. *Hum Mol Genet*. 2019;
- 1034 54. Herrmann CJ, Schmidt R, Kanitz A, Artimo P, Gruber AJ, Zavolan M. PolyASite 2.0: A  
1035 consolidated atlas of polyadenylation sites from 3' end sequencing. *Nucleic Acids*  
1036 *Res*. 2020;48(D1):D174–9.
- 1037 55. Kamieniarz-Gdula K, Proudfoot NJ. Transcriptional Control by Premature Termination:  
1038 A Forgotten Mechanism. Vol. 35, *Trends in Genetics*. 2019. p. 553–64.
- 1039 56. Gruber AJ, Zavolan M. Alternative cleavage and polyadenylation in health and  
1040 disease. Vol. 20, *Nature Reviews Genetics*. 2019. p. 599–614.
- 1041 57. Tian B, Manley JL. Alternative polyadenylation of mRNA precursors. Vol. 18, *Nature*

- 1042           Reviews Molecular Cell Biology. 2016. p. 18–30.
- 1043   58.   Ramírez F, Ryan DP, Grüning B, Bhardwaj V, Kilpert F, Richter AS, et al. deepTools2:  
1044   a next generation web server for deep-sequencing data analysis. *Nucleic Acids Res.*  
1045   2016;44(W1):W160–5.
- 1046   59.   Kanwal M, Smahel M, Olsen M, Smahelova J, Tachezy R. Aspartate  $\beta$ -hydroxylase  
1047   as a target for cancer therapy. *Journal of Experimental and Clinical Cancer Research.*  
1048   2020.
- 1049   60.   Fukuda K, Okuda A, Yusa K, Shinkai Y. A CRISPR knockout screen identifies  
1050   SETDB1-target retroelement silencing factors in embryonic stem cells. *Genome Res.*  
1051   2018;28(6):846–58.
- 1052   61.   Cheng J, Demeulemeester J, Wedge DC, Vollan HKM, Pitt JJ, Russnes HG, et al.  
1053   Pan-cancer analysis of homozygous deletions in primary tumours uncovers rare  
1054   tumour suppressors. *Nat Commun.* 2017;8(1).
- 1055   62.   Jiang K, Rezaczkova L, Hua S, Liu Q, Capitani G, Altelaar AFM, et al. Microtubule  
1056   minus-end regulation at spindle poles by an ASPM-katanin complex. *Nat Cell Biol.*  
1057   2017;19(5):480–92.
- 1058   63.   Akhmanova A, Steinmetz MO. Microtubule minus-end regulation at a glance. Vol.  
1059   132, *Journal of cell science.* 2019.
- 1060   64.   Cheeseman IM, Hori T, Fukagawa T, Desai A. KNL1 and the CENP-H/I/K complex  
1061   coordinately direct kinetochore assembly in vertebrates. *Mol Biol Cell.*  
1062   2008;19(2):587–94.
- 1063   65.   Subramanian A, Tamayo P, Mootha VK, Mukherjee S, Ebert B, Gillette MA, et al.  
1064   Gene set enrichment analysis : A knowledge-based approach for interpreting genome-  
1065   wide. *Proc Natl Acad Sci U S A.* 2005;102(43):15545–15550.
- 1066   66.   Bertoli C, Klier S, McGowan C, Wittenberg C, De Bruin RAM. Chk1 inhibits E2F6  
1067   repressor function in response to replication stress to maintain cell-cycle transcription.  
1068   *Curr Biol.* 2013;23(17):1629–37.
- 1069   67.   Huh MS, Ivanochko D, Hashem LE, Curtin M, Delorme M, Goodall E, et al. Stalled  
1070   replication forks within heterochromatin require ATRX for protection. *Cell Death Dis.*  
1071   2016;7(5).
- 1072   68.   Collis SJ, Boulton SJ. FANCM: Fork pause, rewind and play. Vol. 29, *EMBO Journal.*  
1073   2010. p. 703–5.
- 1074   69.   Xia J, Mei Q, Rosenberg SM. Tools To Live By: Bacterial DNA Structures Illuminate  
1075   Cancer. Vol. 35, *Trends in Genetics.* 2019. p. 383–95.
- 1076   70.   Mijic S, Zellweger R, Chappidi N, Berti M, Jacobs K, Mutreja K, et al. Replication fork  
1077   reversal triggers fork degradation in BRCA2-defective cells. *Nat Commun.* 2017;8(1).
- 1078   71.   Quinet A, Lemaç D, Vindigni A. Molecular Cell Minireview Replication Fork Reversal:  
1079   Players and Guardians. *Mol Cell.* 2017;68:830–3.
- 1080   72.   König J, Zarnack K, Rot G, Curk T, Kayikci M, Zupan B, et al. ICLIP reveals the  
1081   function of hnRNP particles in splicing at individual nucleotide resolution. *Nat Struct*  
1082   *Mol Biol.* 2010;17(7):909–15.
- 1083   73.   Black DL. Finding splice sites within a wilderness of RNA. Vol. 1, *RNA (New York,*  
1084   *N.Y.).* 1995. p. 763–71.
- 1085   74.   Alpha-thalassemia-X-linked intellectual disability syndrome. In: *Definitions.* 2020.
- 1086   75.   Genin A, Desir J, Lambert N, Biervliet M, Van der Aa N, Pierquin G, et al. Kinetochore  
1087   KMN network gene CASC5 mutated in primary microcephaly. *Hum Mol Genet.*  
1088   2012;21(24):5306–17.
- 1089   76.   Pulvers JN, Bryk J, Fish JL, Wilsch-Bräuninger M, Arai Y, Schreier D, et al. Mutations  
1090   in mouse *Aspm* (abnormal spindle-like microcephaly associated) cause not only  
1091   microcephaly but also major defects in the germline. *Proc Natl Acad Sci U S A.*  
1092   2010;107(38):16595–600.
- 1093   77.   Andrews S. FastQC - A quality control tool for high throughput sequence data.  
1094   <http://www.bioinformatics.babraham.ac.uk/projects/fastqc/> [Internet]. Babraham  
1095   Bioinformatics. 2010. p. <http://www.bioinformatics.babraham.ac.uk/projects/>. Available  
1096   from: <http://www.bioinformatics.babraham.ac.uk/projects/fastqc/>

- 1097 78. Dobin A, Davis CA, Schlesinger F, Drenkow J, Zaleski C, Jha S, et al. STAR: Ultrafast  
1098 universal RNA-seq aligner. *Bioinformatics*. 2013;29(1):15–21.
- 1099 79. Patro R, Duggal G, Love MI, Irizarry RA, Kingsford C. Salmon provides fast and bias-  
1100 aware quantification of transcript expression. *Nat Methods*. 2017;14(4):417–9.
- 1101 80. Li H, Handsaker B, Wysoker A, Fennell T, Ruan J, Homer N, et al. The Sequence  
1102 Alignment/Map format and SAMtools. *Bioinformatics*. 2009;
- 1103 81. Karolchik D, Barber GP, Casper J, Clawson H, Cline MS, Diekhans M, et al. The  
1104 UCSC Genome Browser database: 2014 update. *Nucleic Acids Res*. 2014;42(D1).
- 1105 82. Liao Y, Smyth GK, Shi W. FeatureCounts: An efficient general purpose program for  
1106 assigning sequence reads to genomic features. *Bioinformatics*. 2014;30(7):923–30.
- 1107 83. Storey JD, Bass AJ, Dabney A, Robinson D. Title Q-value estimation for false  
1108 discovery rate control. 2020.
